# Supplementary material for: Deep-seated gravitational slope deformation scaling on Mars and Earth: same fate for different initial conditions and structural evolutions
Source: Copernicus journal article supplement (doi:10.5194/esurf-7-361-2019), 2019-04-16

## Supplementary Material 2

### Extensive set of topographic profiles for the six study sites

The location of the interpreted fault scarps is indicated by arrows. The Valles Marineris profiles were measured on MRO/CTX digital elevation models generated with Socet Set® and have a vertical error of 10-15 m. The Tatra Mountains (sites T1-T3) profiles display the GPS data measured in the field, with an error of 40 cm (Kromuszczyńska et al., 2016). The horizontal and vertical axes are all measured in metres.

---

#### SITE M1 – Coprates Montes

---

##### Coprates Chasma internal ridge, profile c1p1

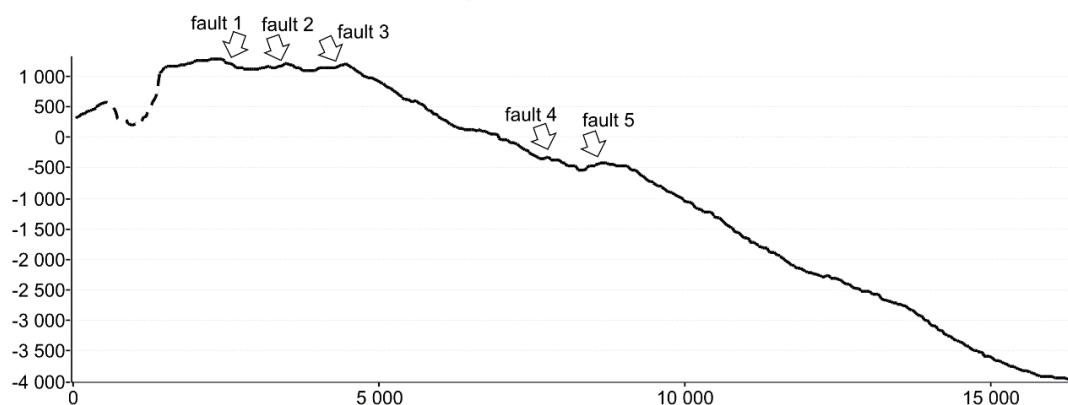

Individual profiles perpendicular to the interpreted faults:

- fault 1

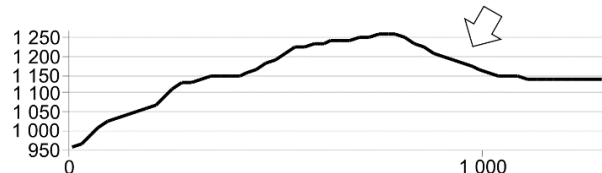

- fault 2

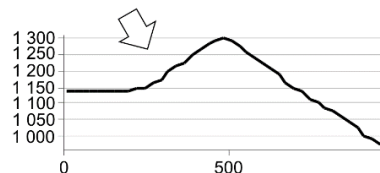

- fault 3

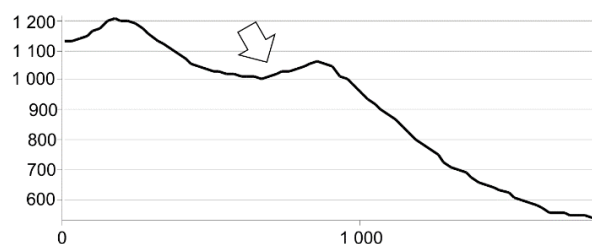

- faults 4 and 5

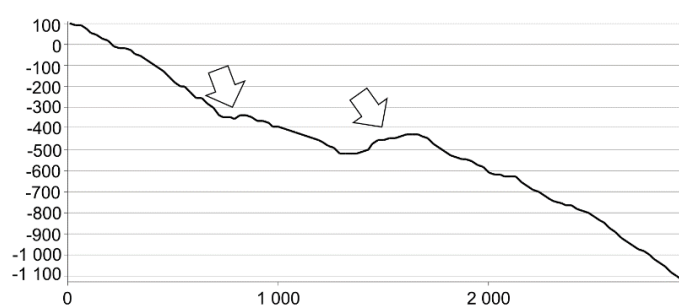

## Coprates Chasma internal ridge, profile c1p2

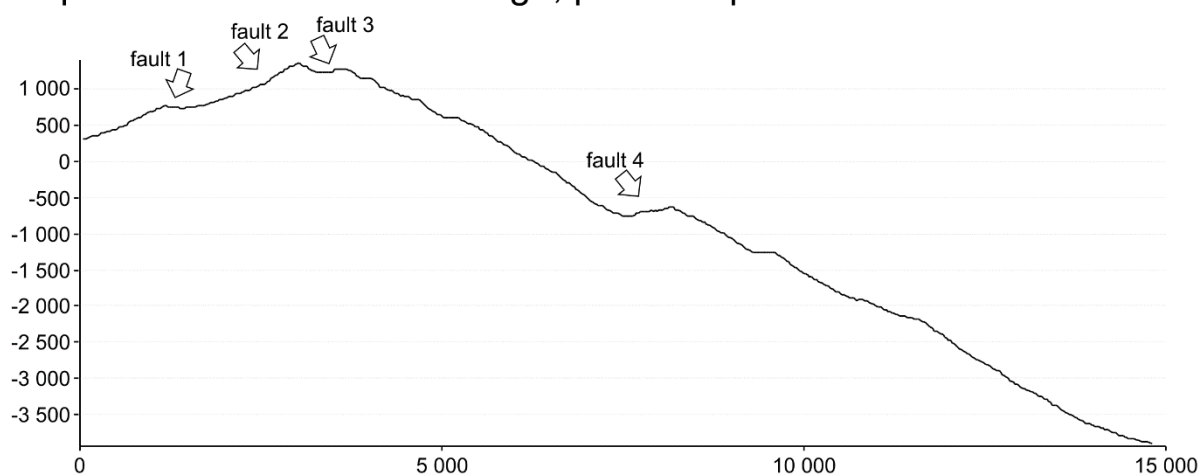

Individual profiles perpendicular to the interpreted faults:

- faults 1, 2 and 3

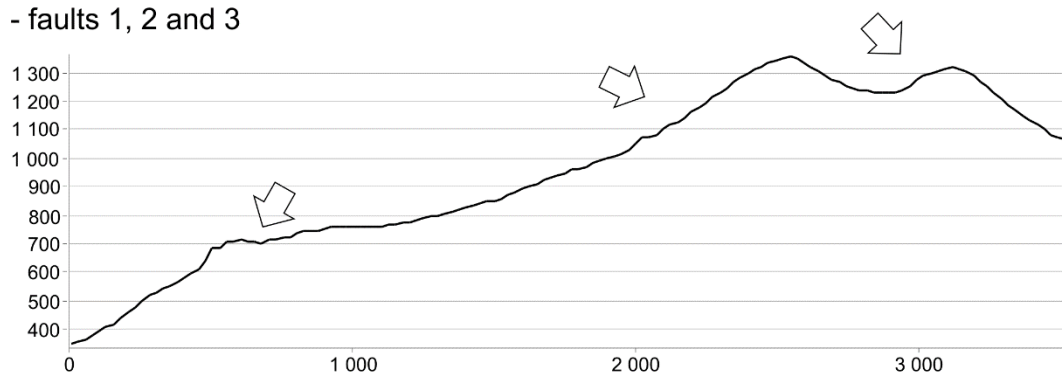

- fault 4

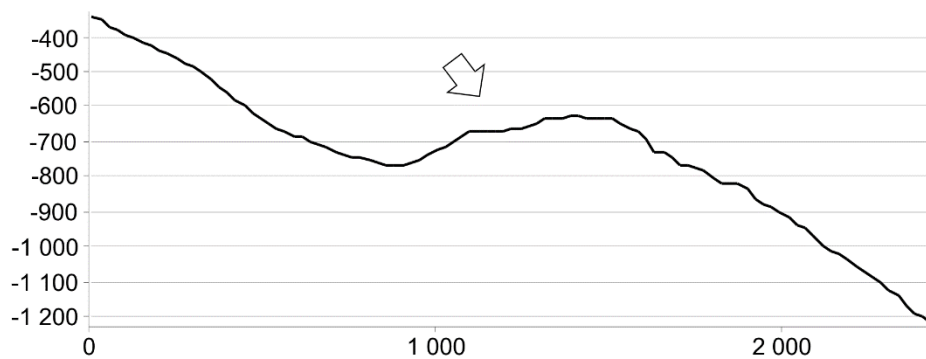

## Coprates Chasma internal ridge, profile c1p3

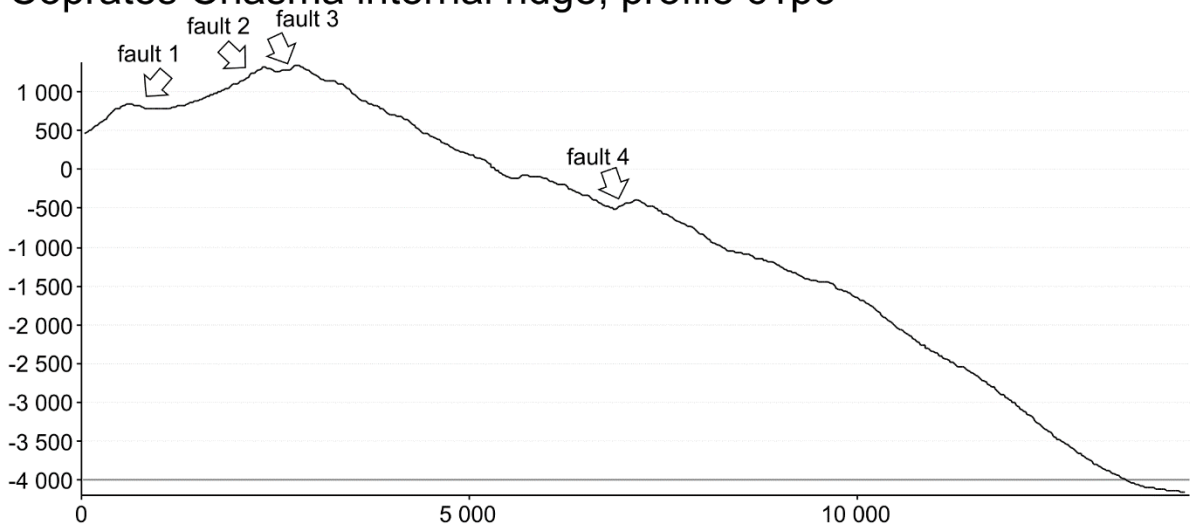

Individual profiles perpendicular to the interpreted faults:

- fault 1

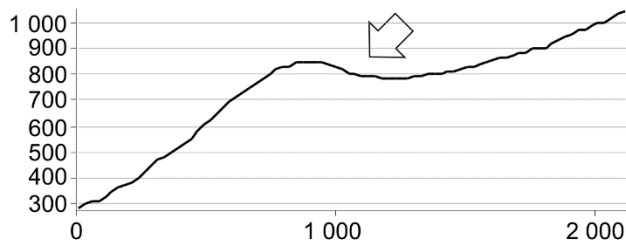

- faults 2 and 3

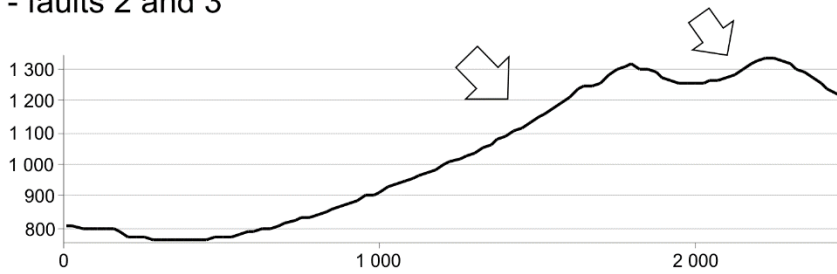

- fault 4

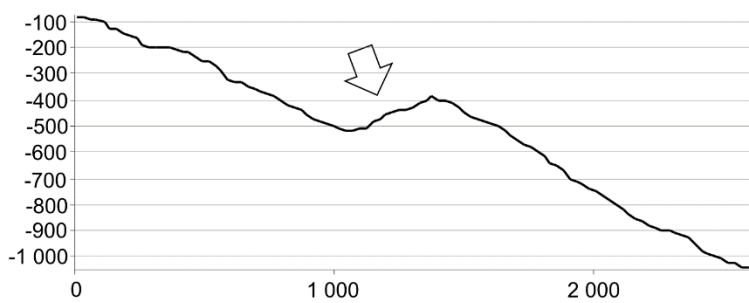

## Coprates Chasma internal ridge, profile c1p4

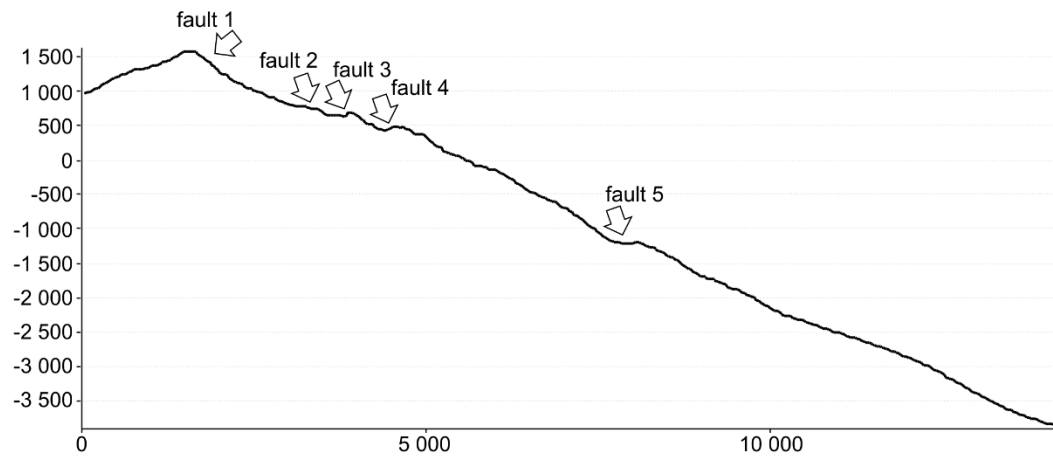

Individual profiles perpendicular to the interpreted faults:

- fault 1

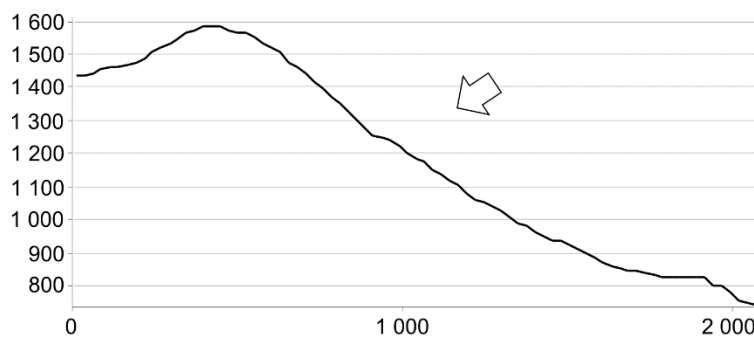

- faults 2 and 3

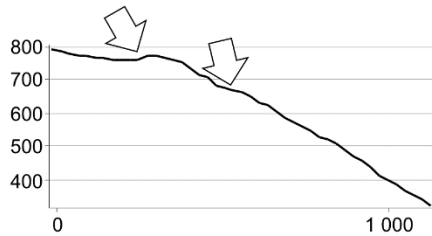

- fault 4

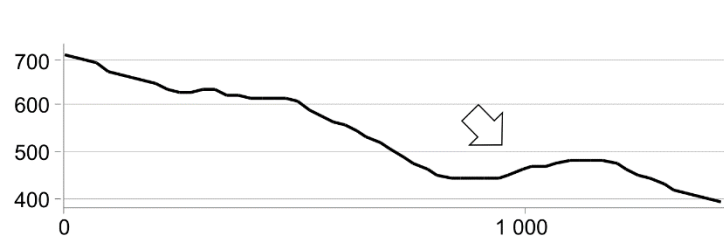

- fault 5

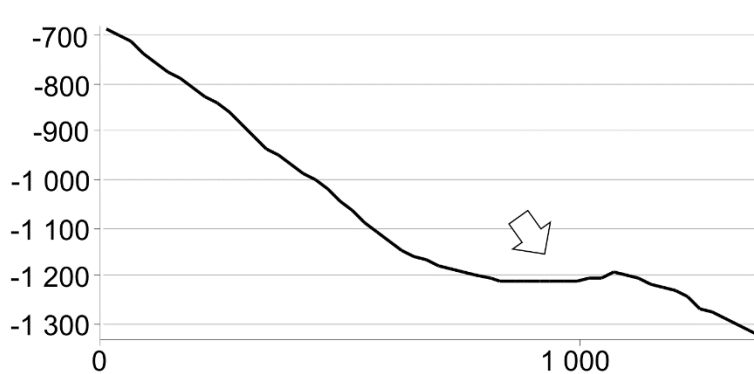

## Coprates Chasma internal ridge, profile c1p5

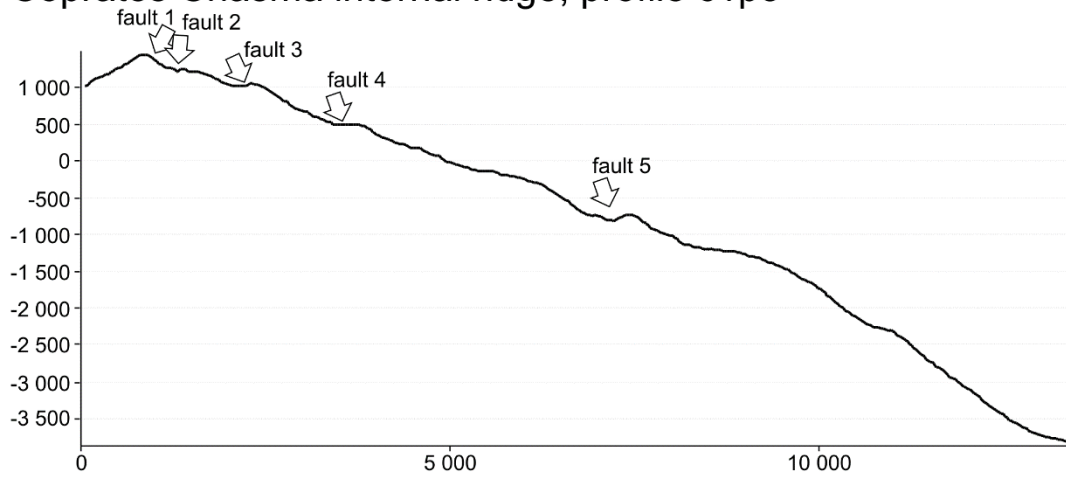

Individual profiles perpendicular to the interpreted faults:

- faults 1 and 2

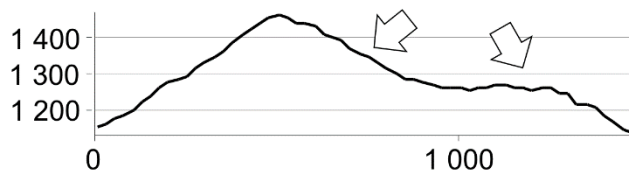

- fault 3

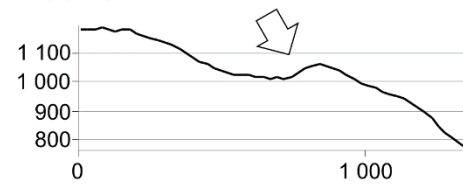

- fault 4

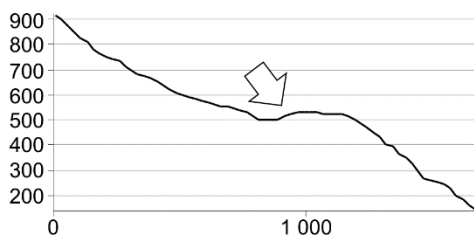

- fault 5

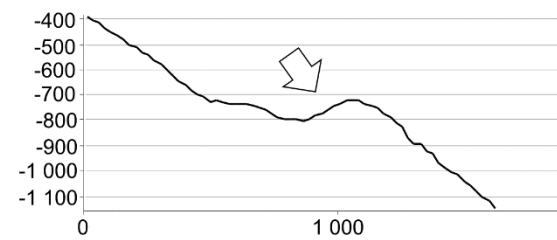

## Coprates Chasma internal ridge, profile c1p6

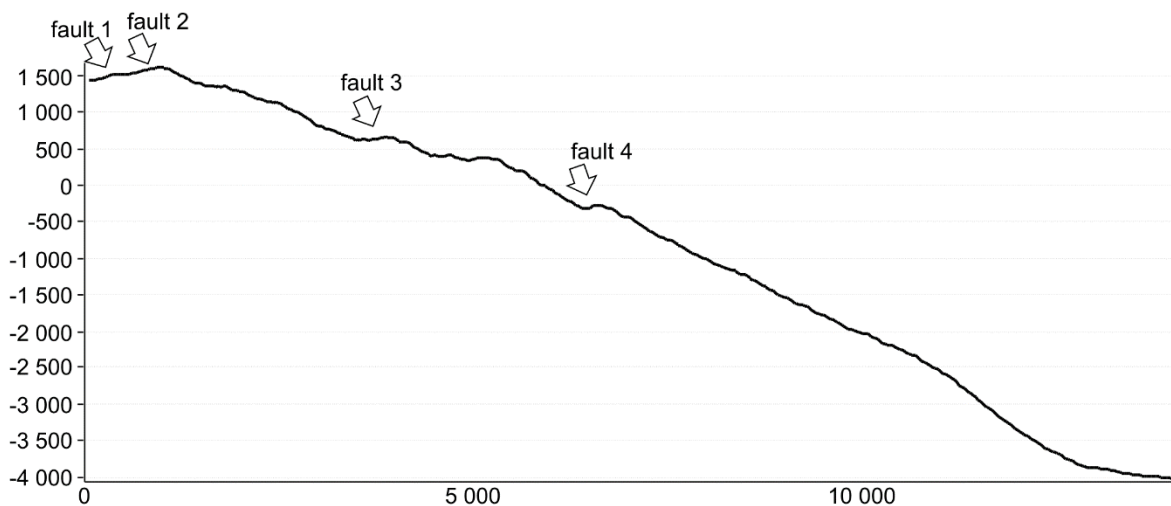

Individual profiles perpendicular to the interpreted faults:

- faults 1 and 2

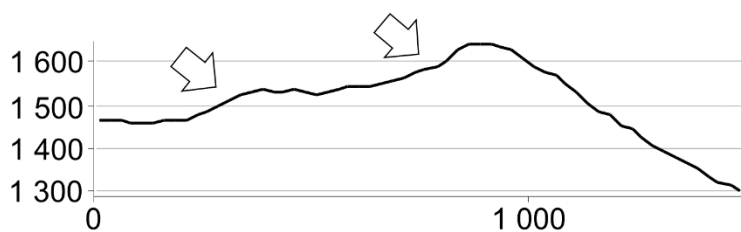

- fault 3

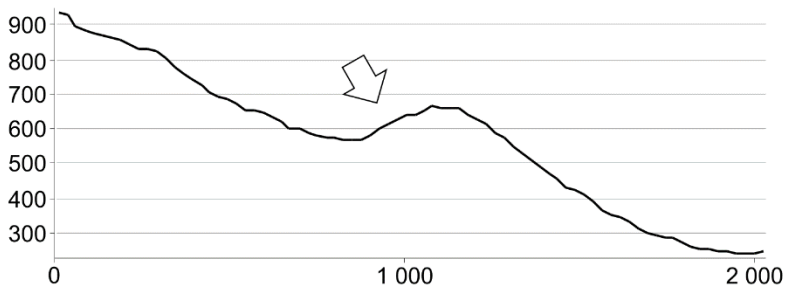

- fault 4

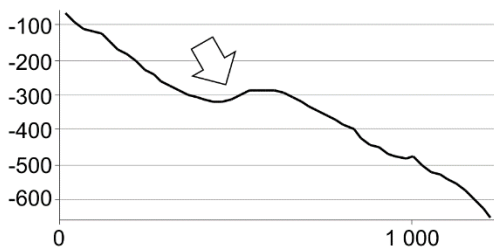

## Coprates Chasma internal ridge, profile c2p1

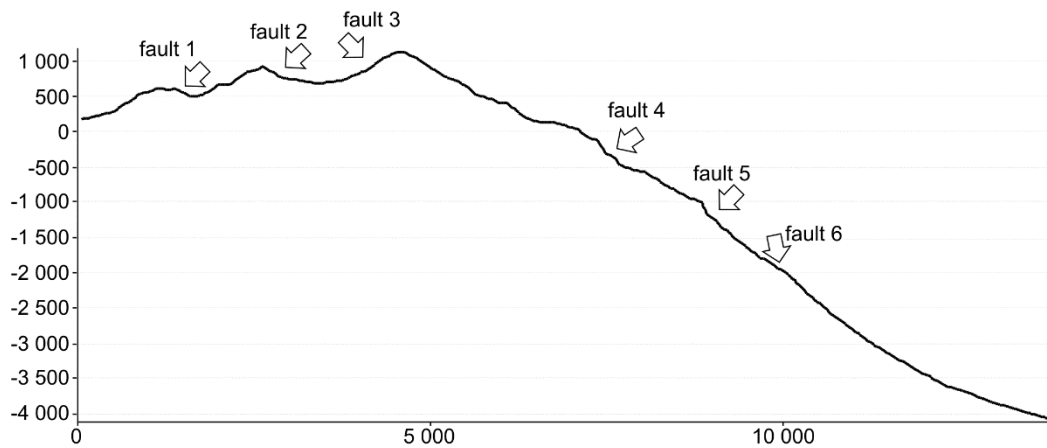

Individual profiles perpendicular to the interpreted faults:

- fault 1

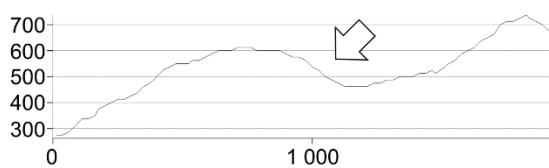

- fault 2

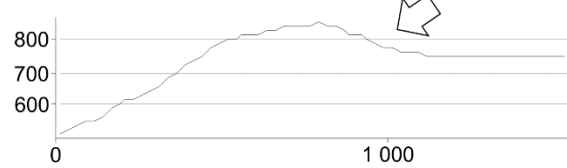

- fault 3

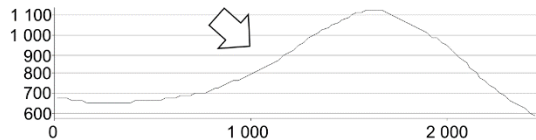

- fault 4

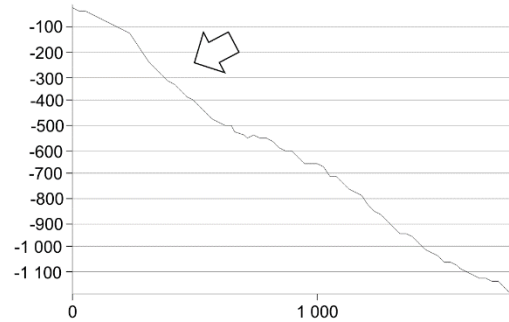

- fault 5

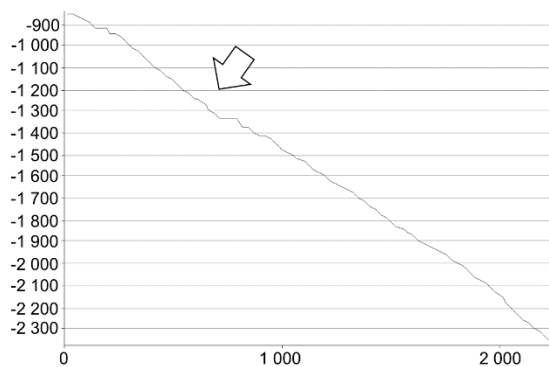

- fault 6

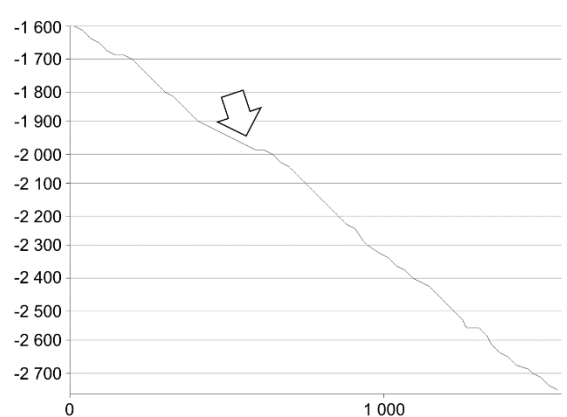

## Coprates Chasma internal ridge, profile c2p2

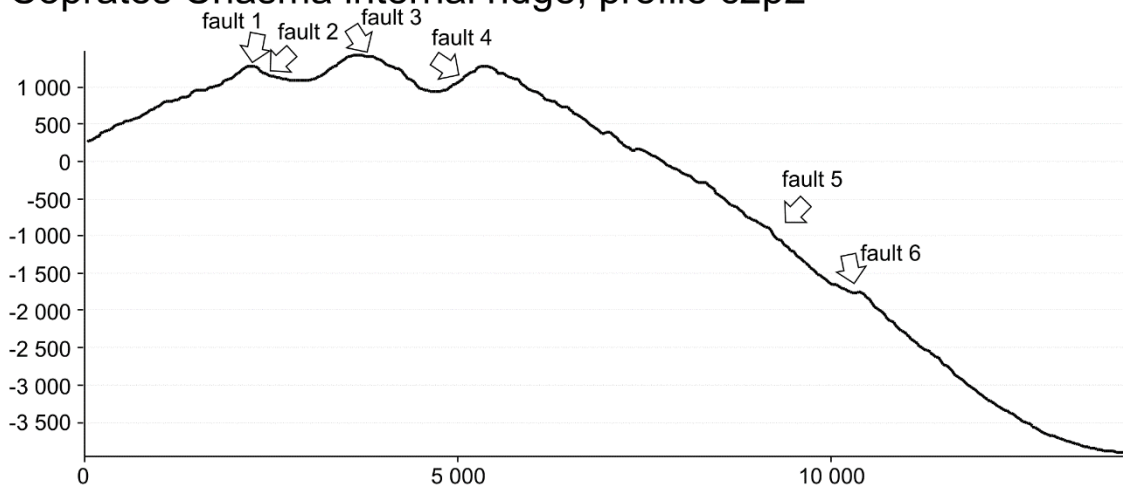

Individual profiles perpendicular to the interpreted faults:

- fault 1

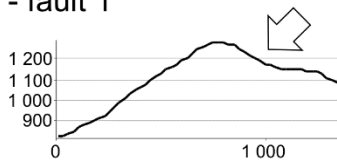

- fault 2

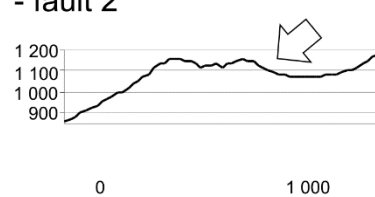

- fault 3

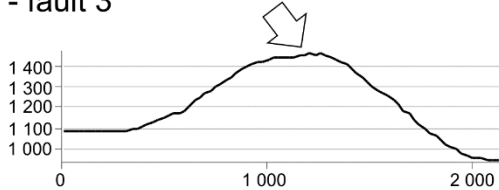

- fault 4

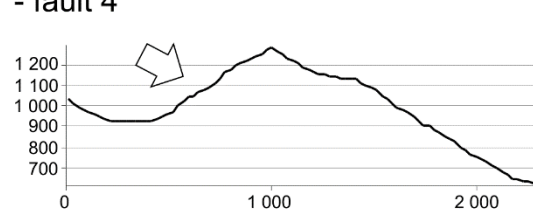

- faults 5 and 6

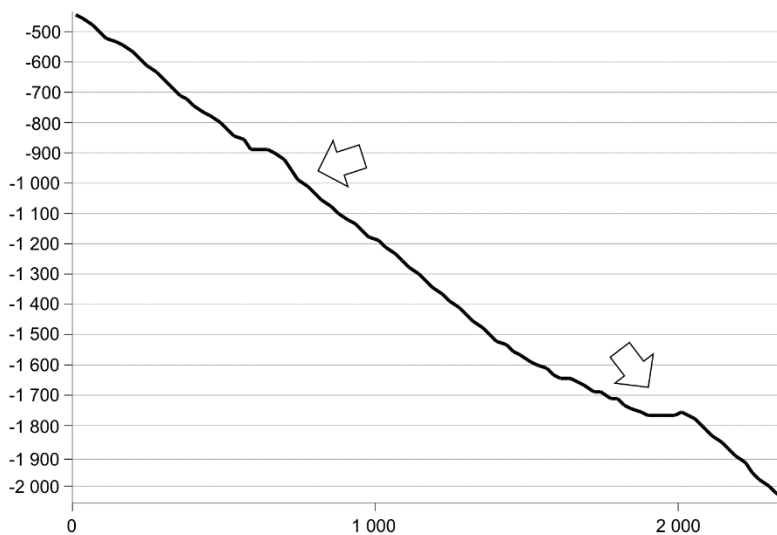

Figure 7.13. Profile c2p2.

## Coprates Chasma internal ridge, profile c2p3

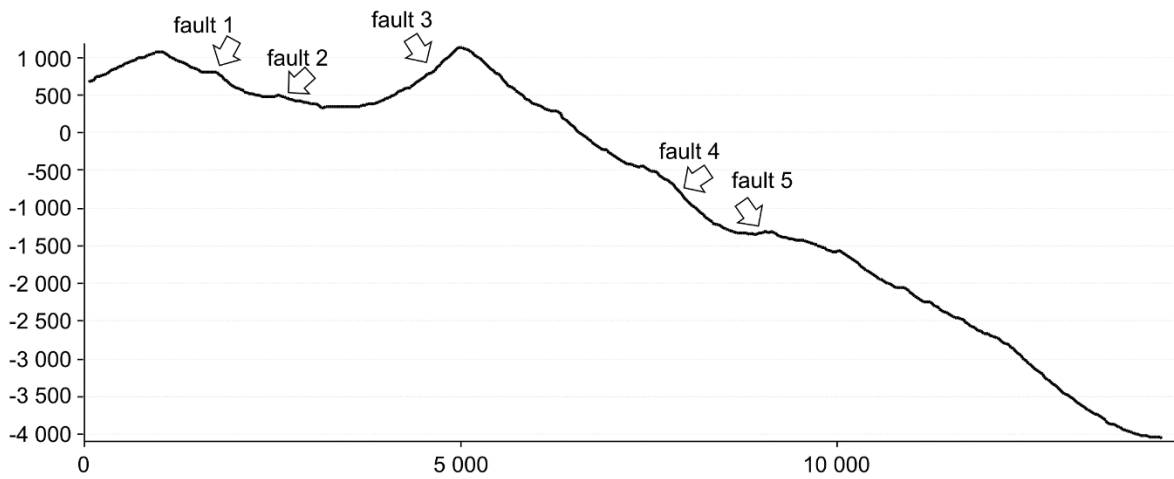

Individual profiles perpendicular to the interpreted faults:

- faults 1 and 2

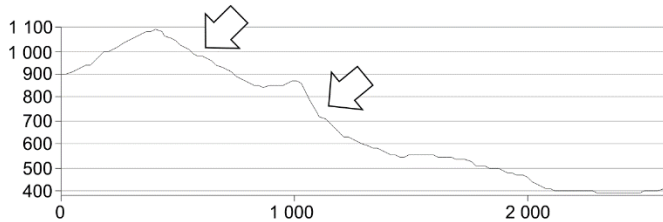

- fault 3

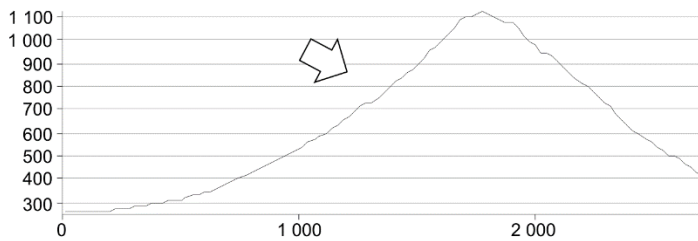

- faults 4 and 5

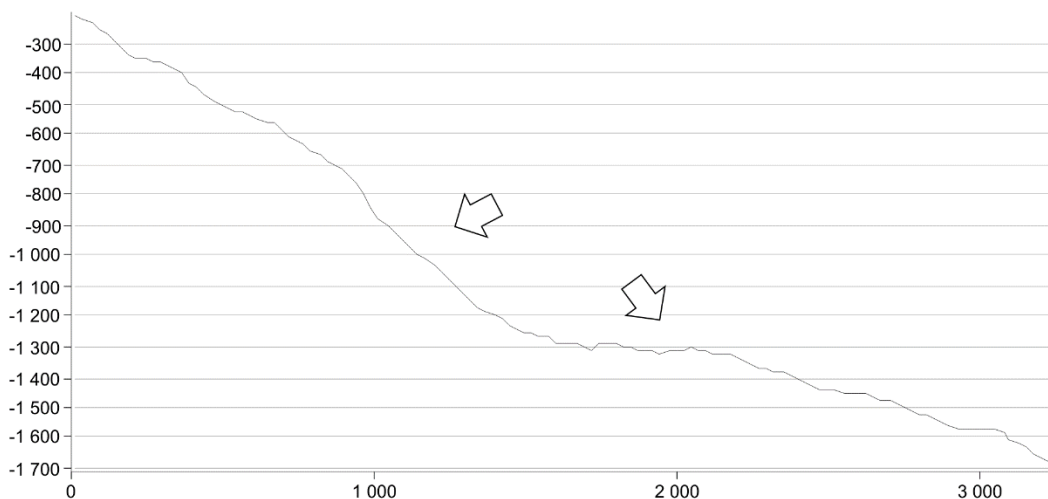

**Figure 7.14.** Profile c2p3.

## Coprates Chasma internal ridge, profile c2p4

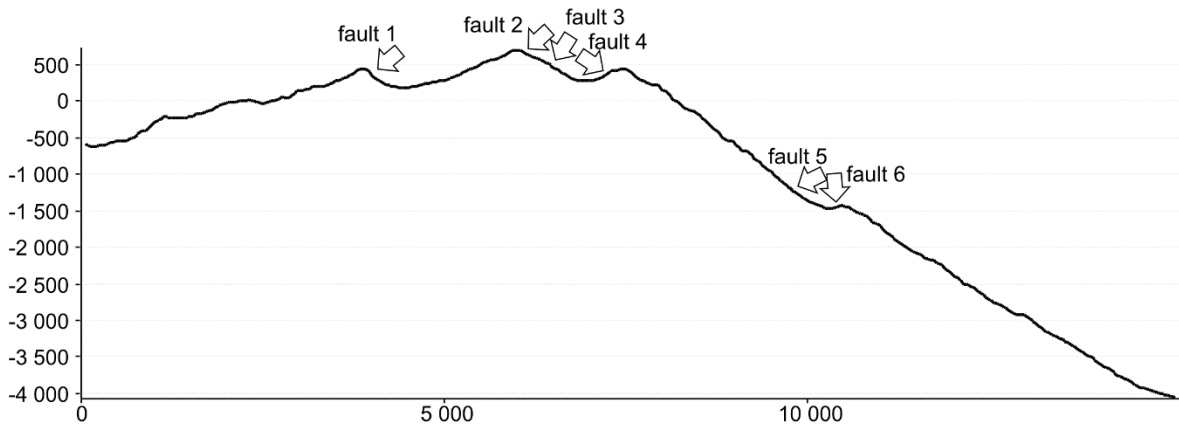

Individual profiles perpendicular to the interpreted faults:

- fault 1

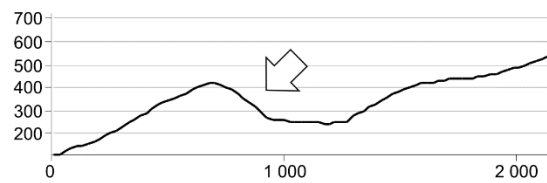

- faults 2 and 3

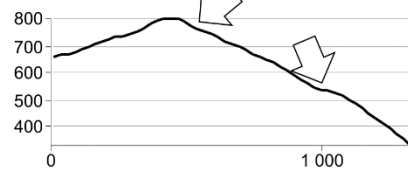

- fault 4

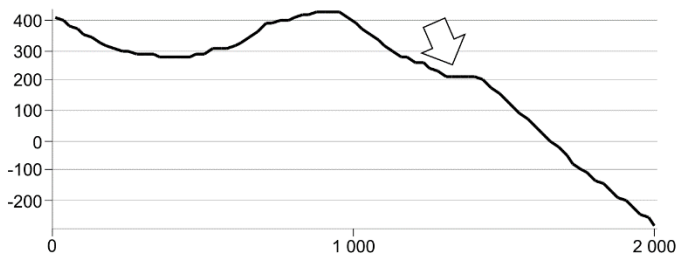

- faults 5 and 6

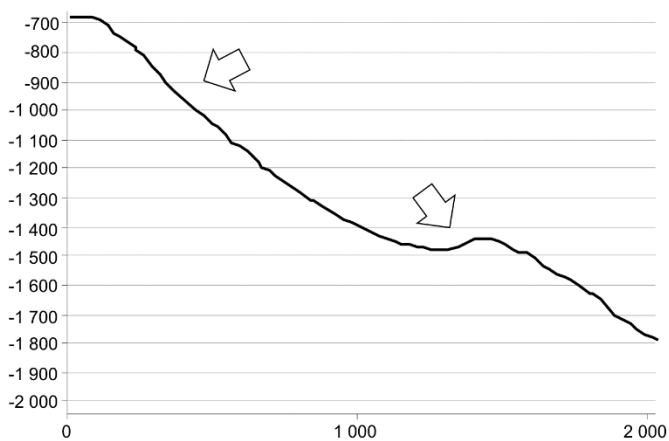

## Coprates Chasma internal ridge, profile c2p5

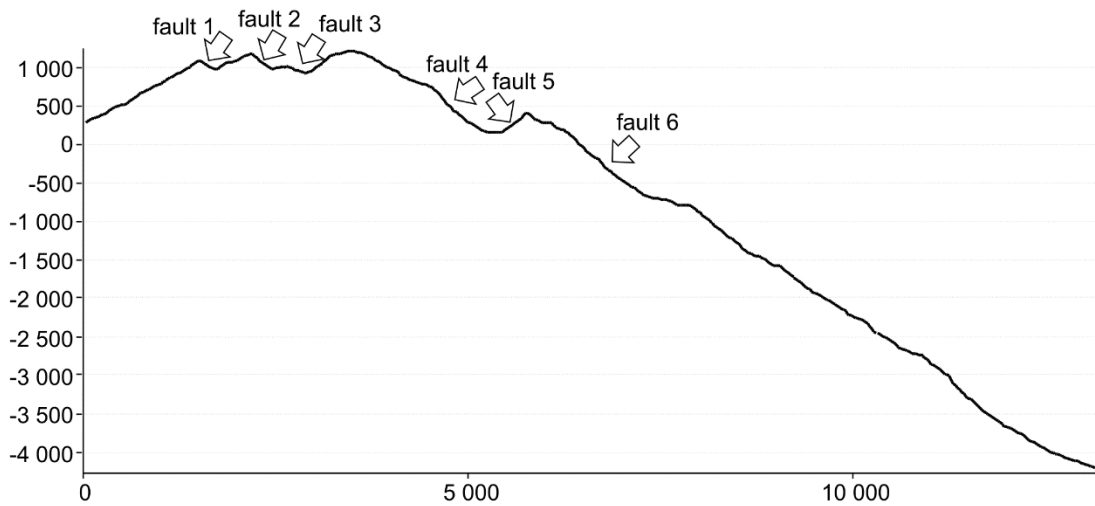

Individual profiles perpendicular to the interpreted faults:

- fault 1

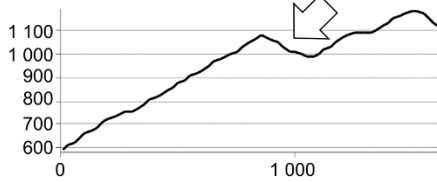

- faults 2 and 3

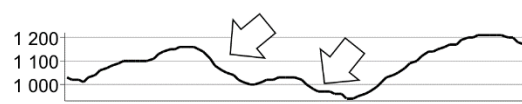

- fault 4

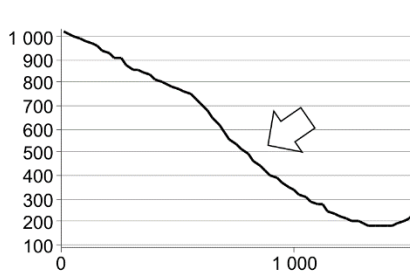

- fault 5

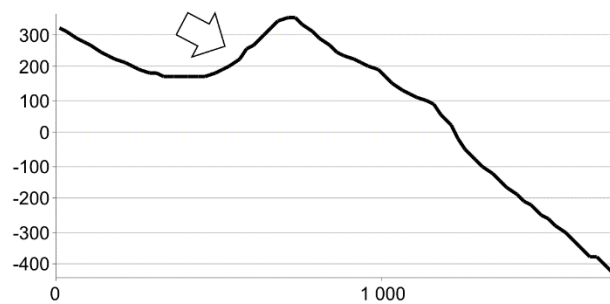

- fault 6

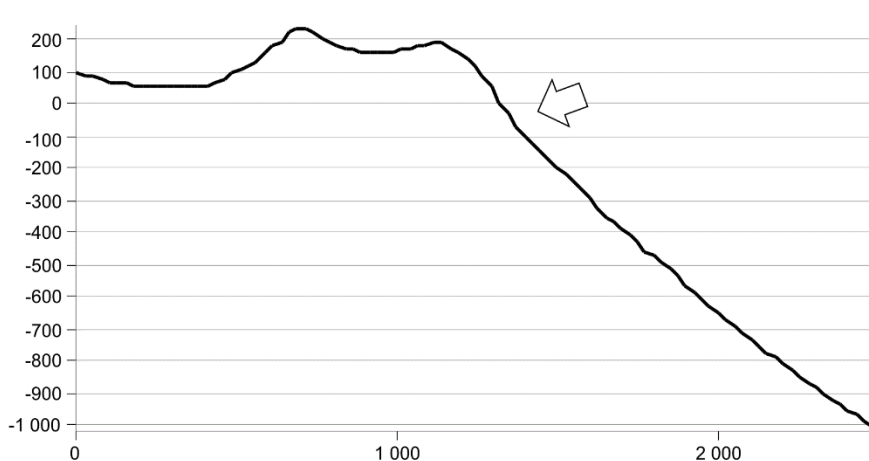

---

## SITE M2 – Melas – Candor boundary

---

Melas-Candor boundary ridge, profile mc1

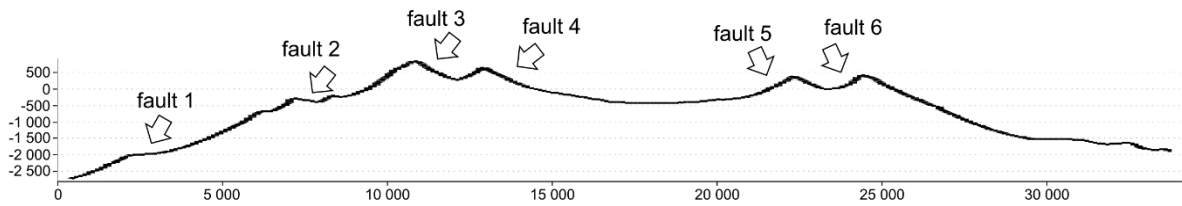

Melas-Candor boundary ridge, profile mc2

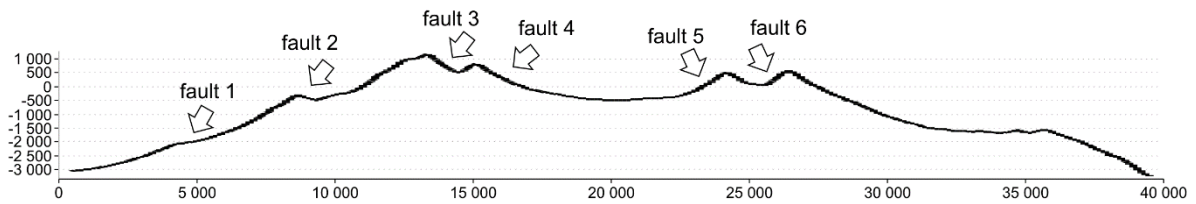

Melas-Candor boundary ridge, profile mc3

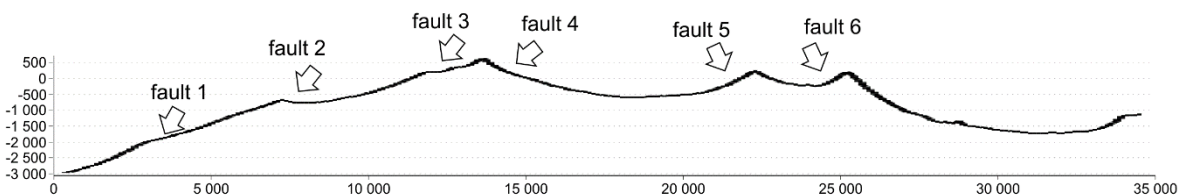

Melas-Candor boundary ridge, profile mc4

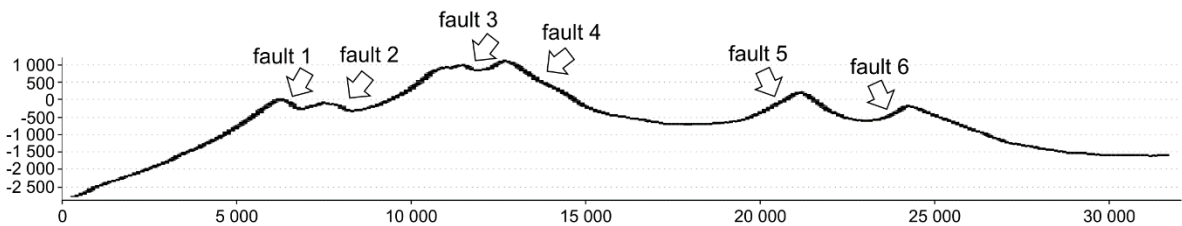

Melas-Candor boundary ridge, profile mc5

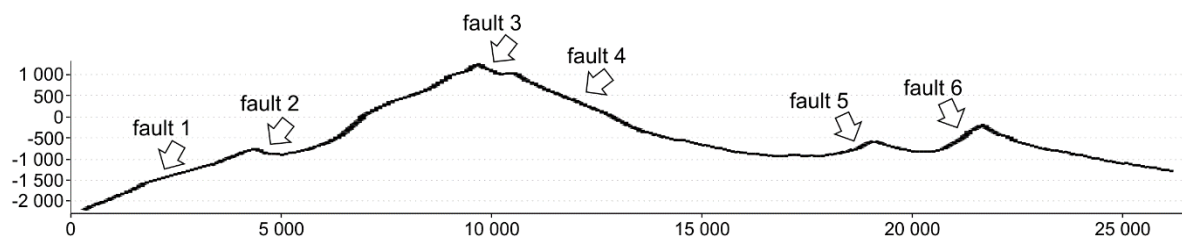

## SITE M3 – Candor-Ophir boundary

### Candor-Ophir boundary ridge, profile co1

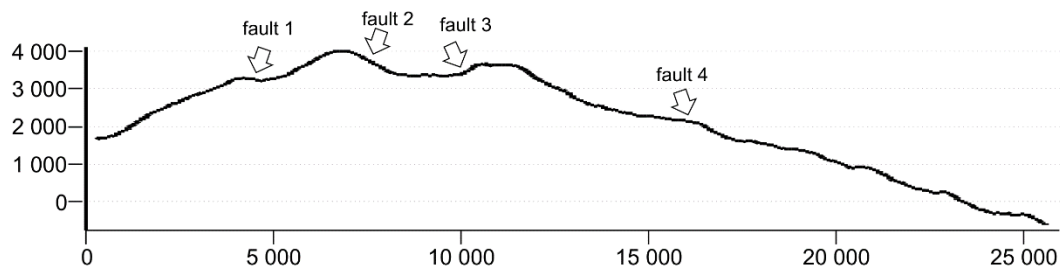

Individual profiles perpendicular to the interpreted faults:

- fault 1

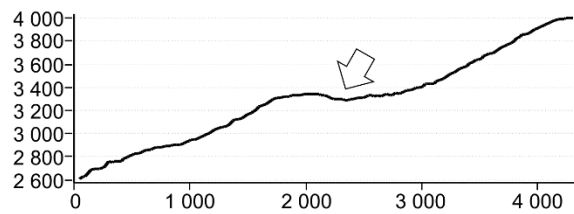

- fault 2

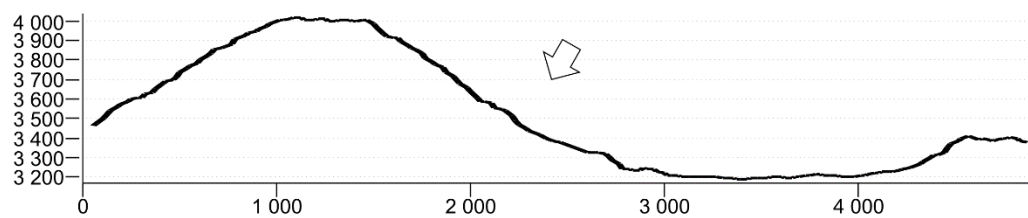

- fault 3

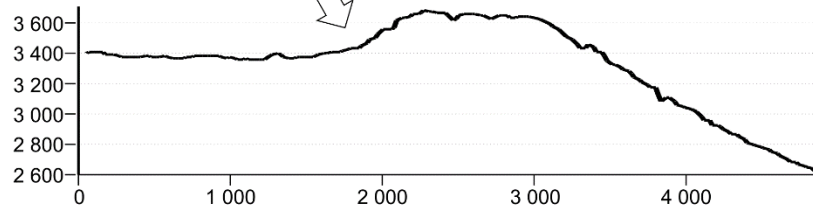

- fault 4

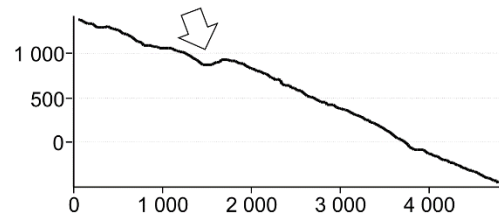

## Candor-Ophir boundary ridge, profile co2

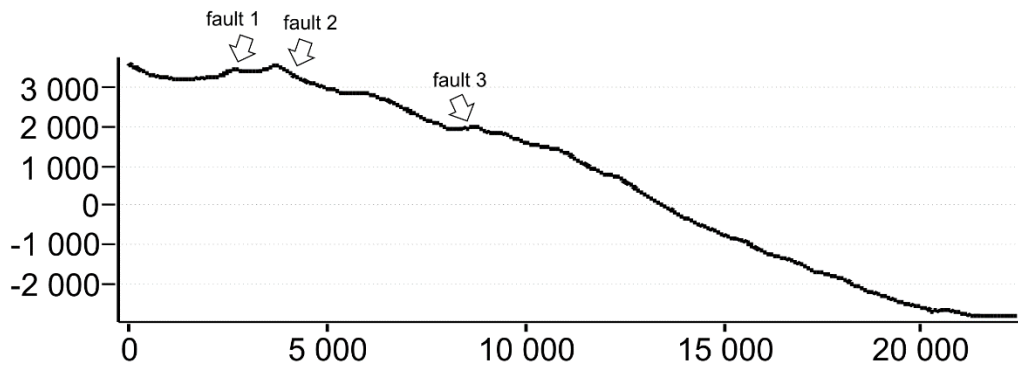

Individual profiles perpendicular to the interpreted faults:

- fault 1

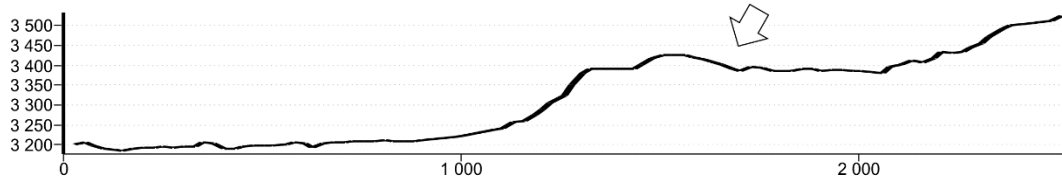

- fault 2

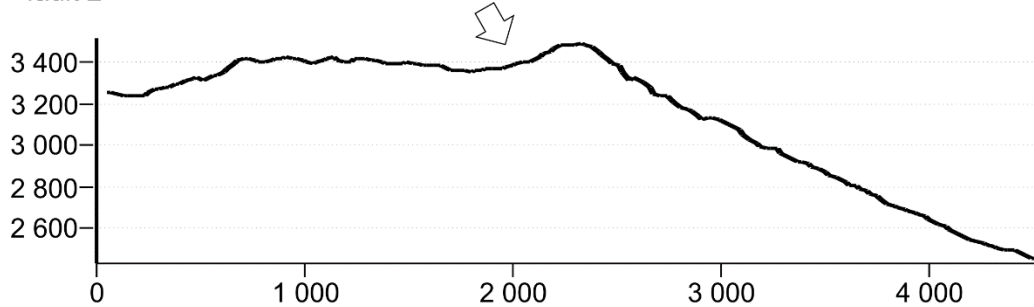

- fault 3

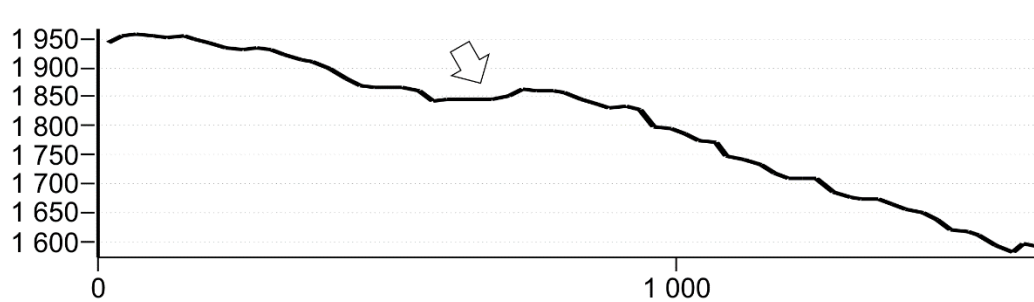

## Candor-Ophir boundary ridge, profile co3

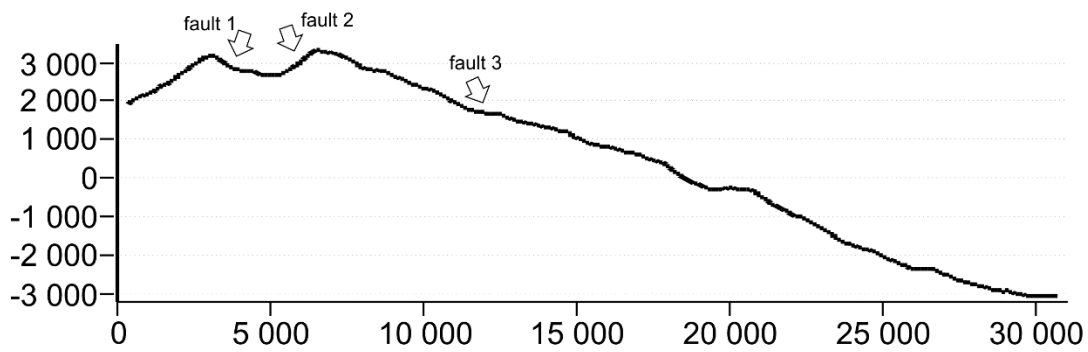

Individual profiles perpendicular to the interpreted faults:

- faults 1 and 2

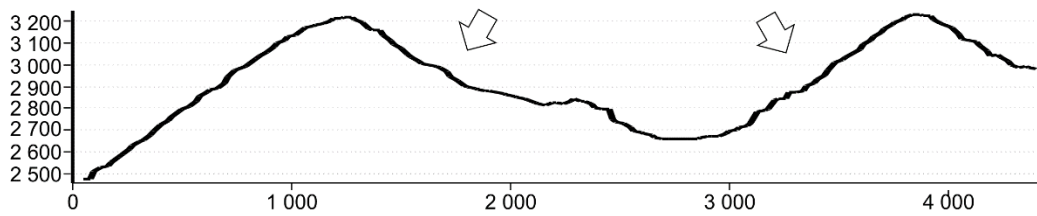

- fault 3

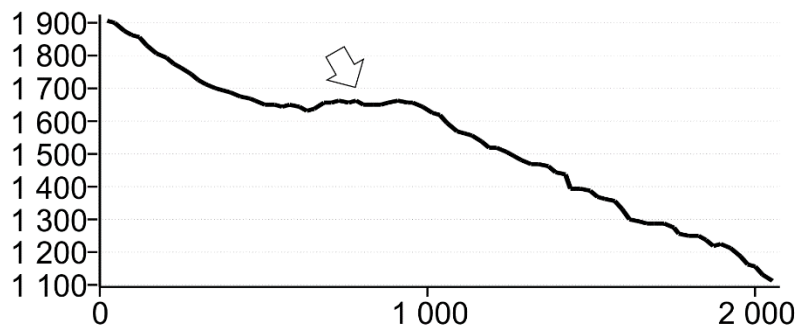

## Candor-Ophir boundary ridge, profile co4

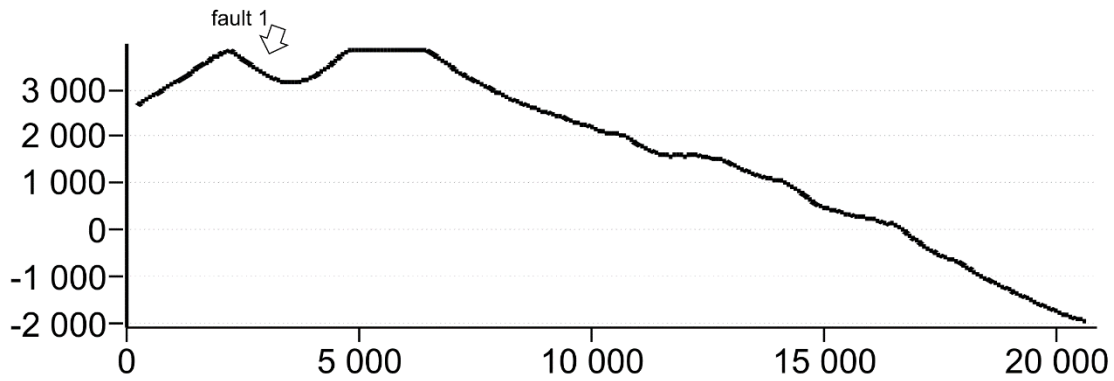

Individual profile perpendicular to the interpreted fault:

- fault 1

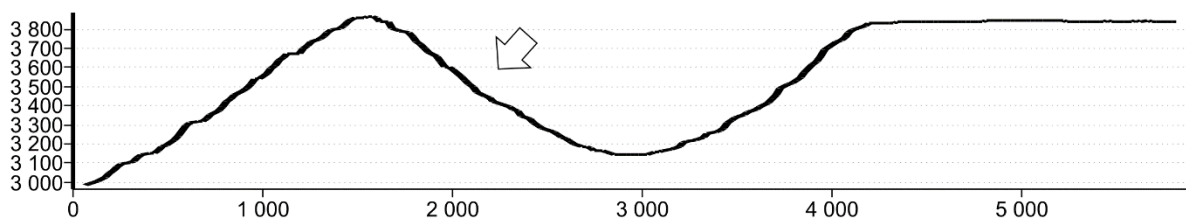

## Candor-Ophir boundary ridge, profile co5

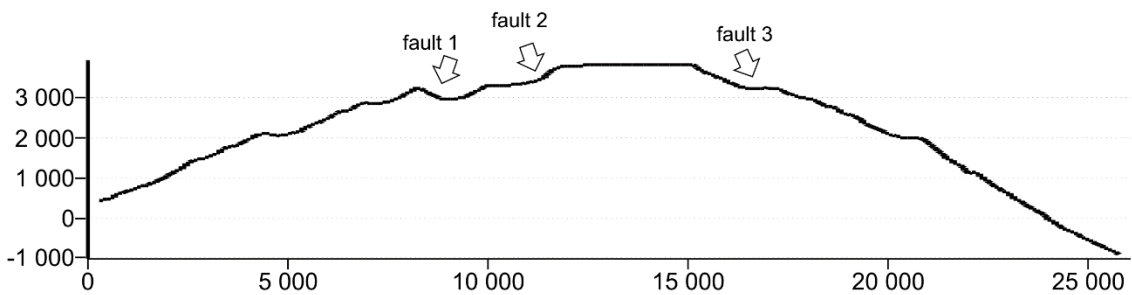

Individual profiles perpendicular to the interpreted faults:

- faults 1 and 2

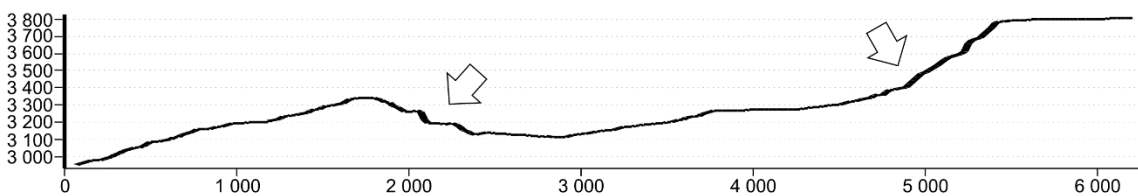

- fault 3

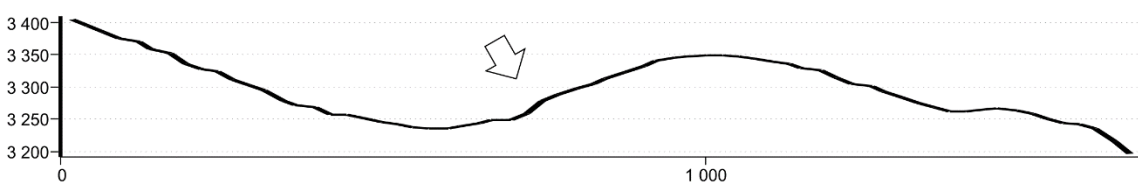

## Candor-Ophir boundary ridge, profile co6

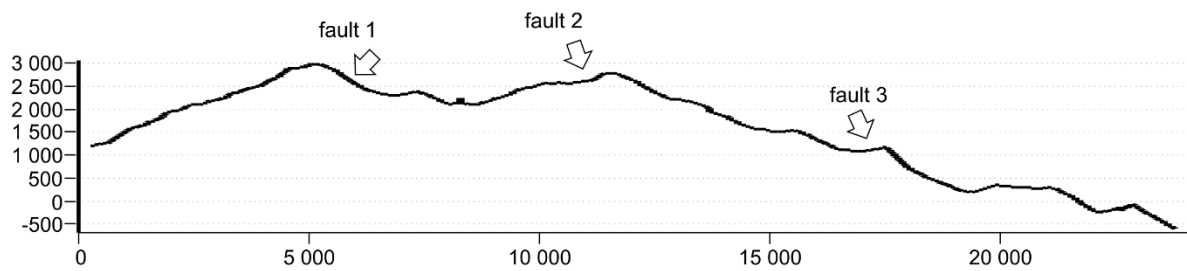

Individual profiles perpendicular to the interpreted faults:

- fault 1

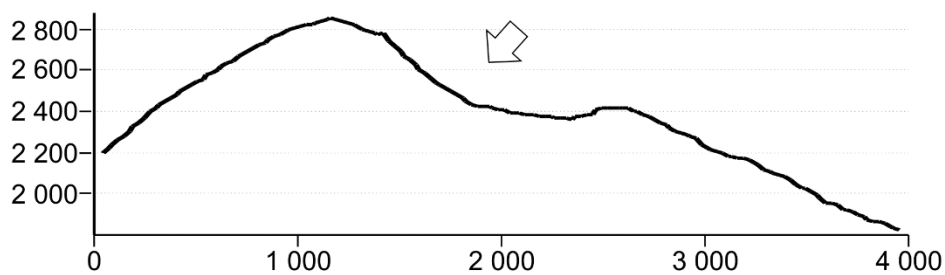

- fault 2

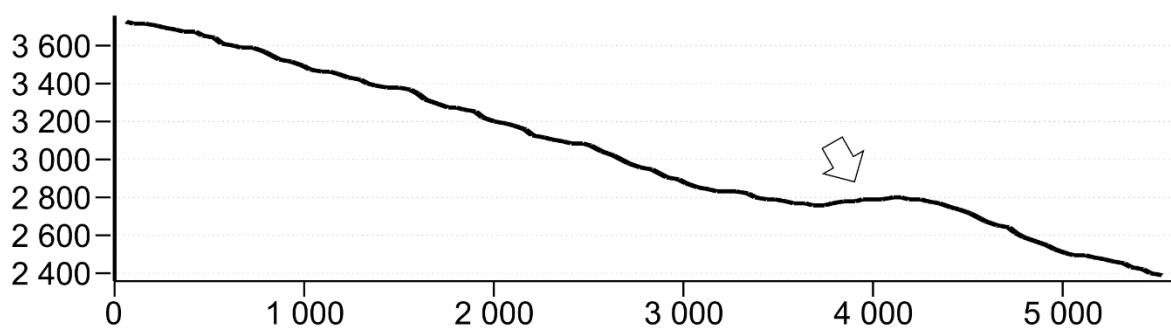

- fault 3

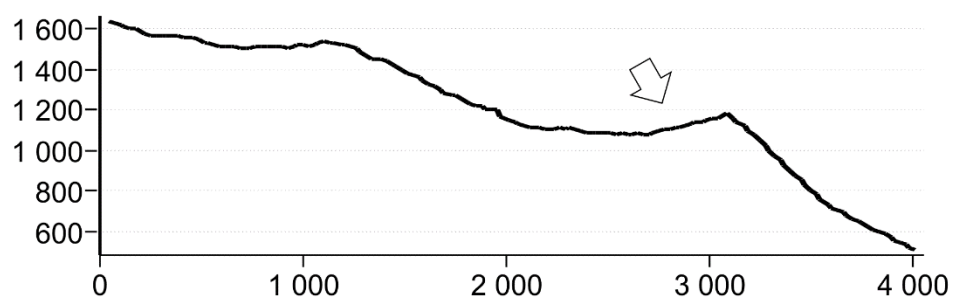

---

## SITE T1 – Jamnícke Sedlo

---

### JS04-JS07

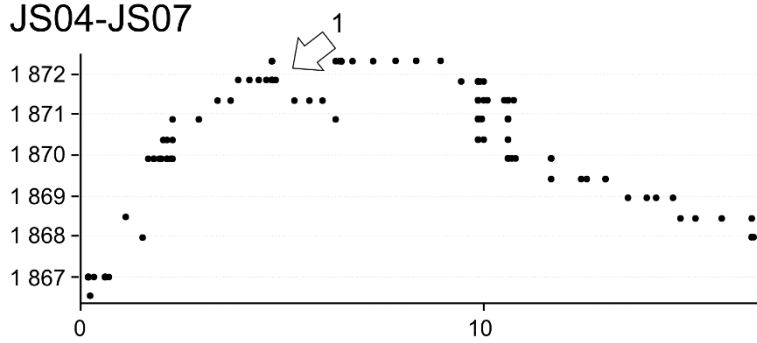

### JS14-JS18

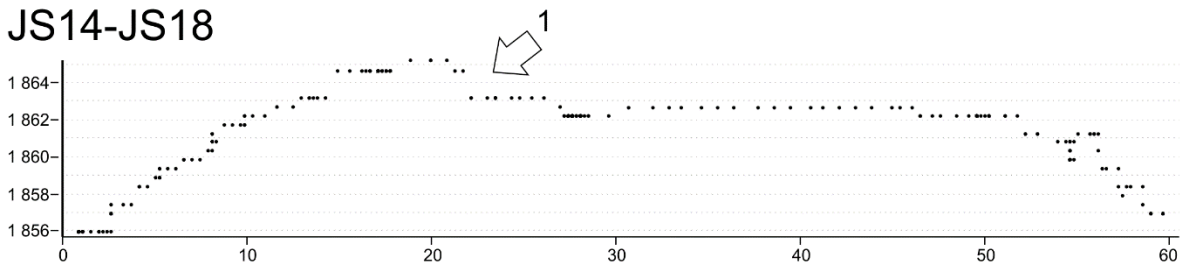

### JS19-JS24

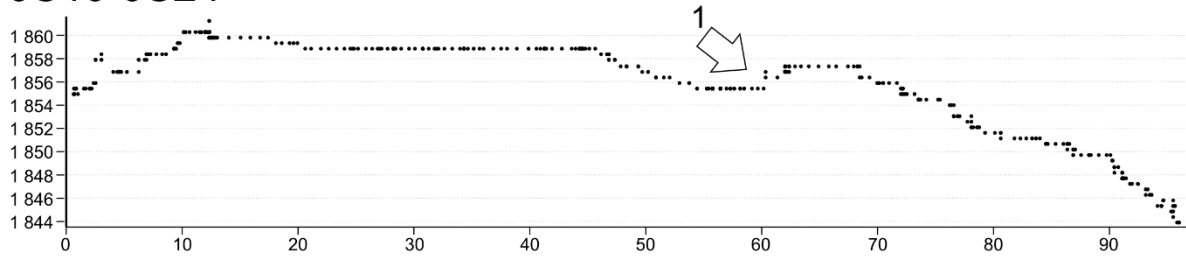

### JS25-JS29

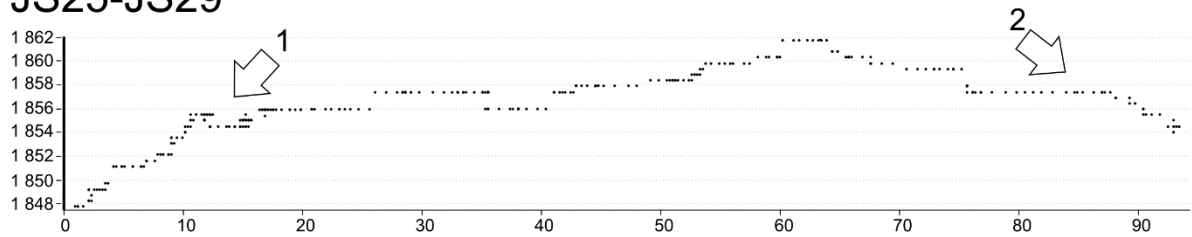

### JS30-JS35

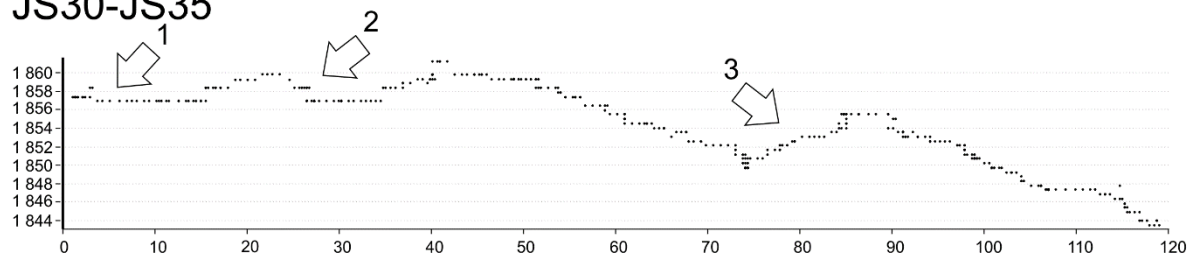

### JS36-JS42

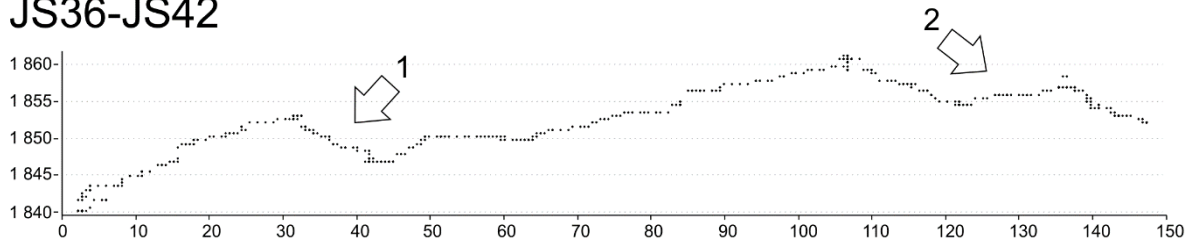

### JS43-JS48

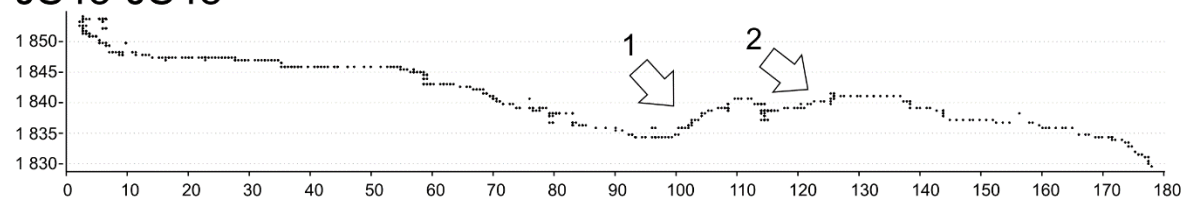

### JS49-JS52

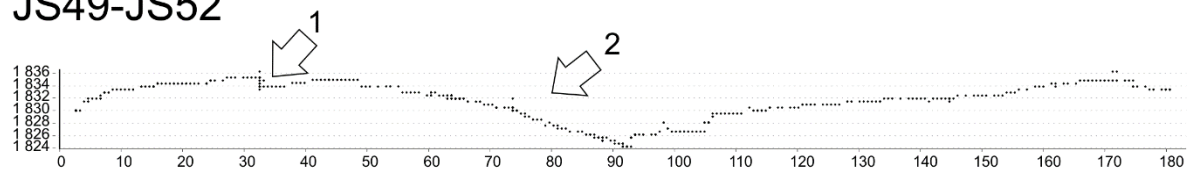

### JS53-JS55

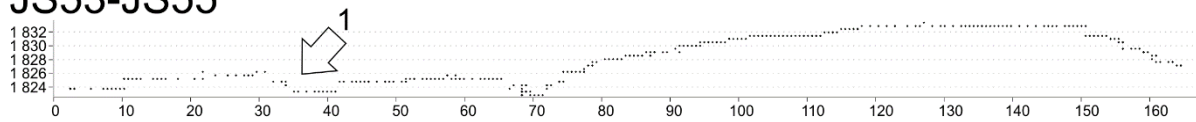

## SITE T2 – Vel'ká Garajova Kopa

011-025

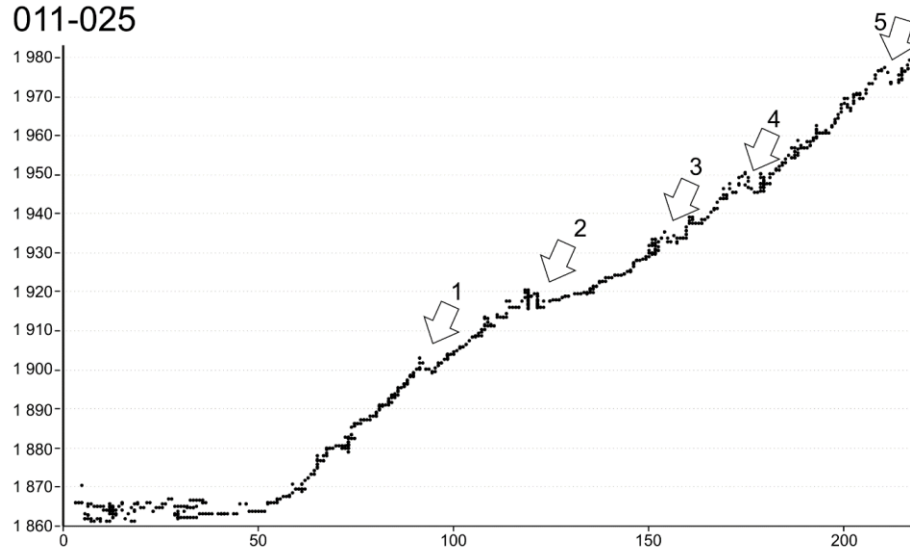

027-030

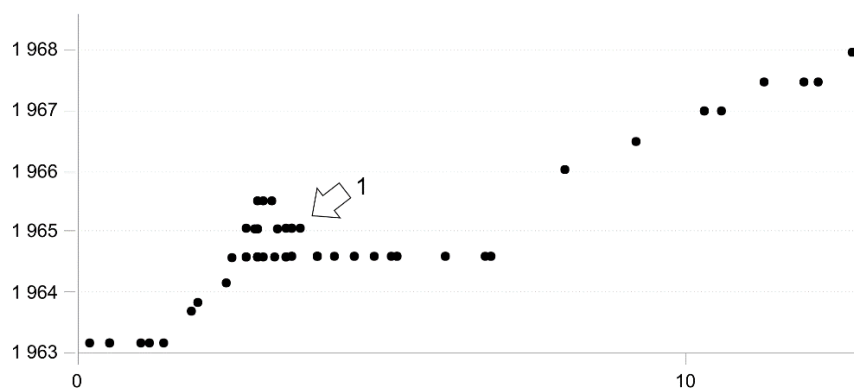

031-034

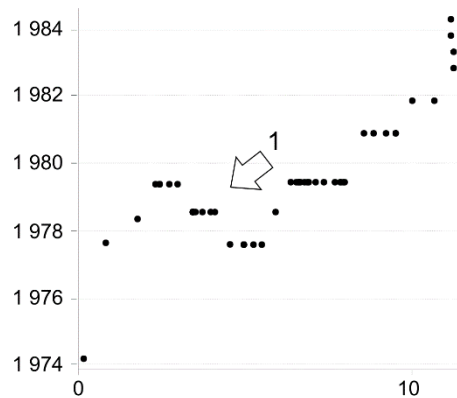

036-037

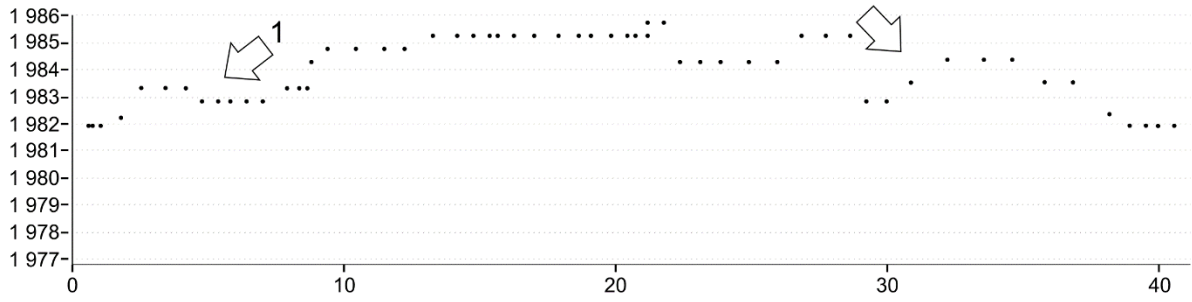

038-041

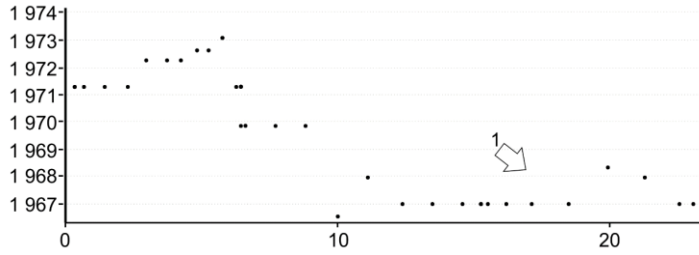

042-046

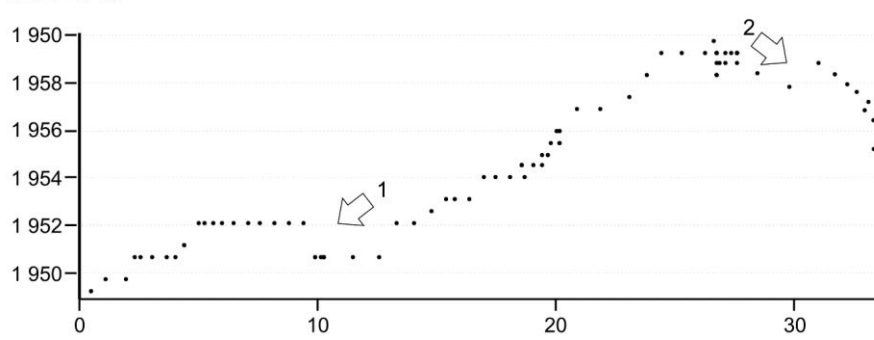

050-053

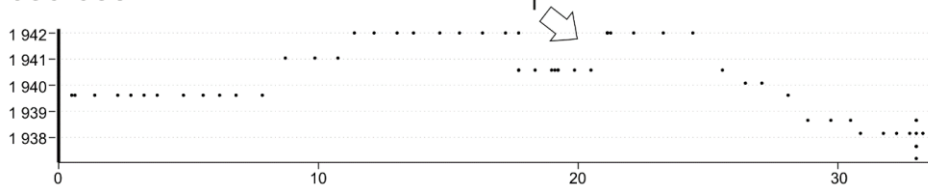

054-057

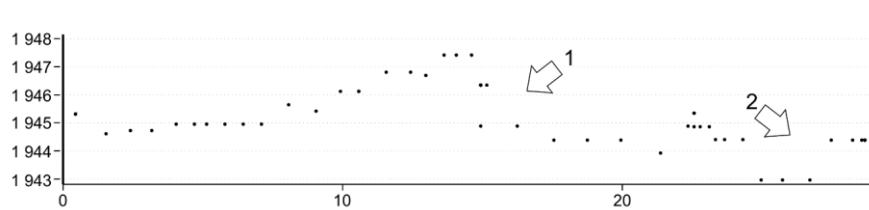

## 058-065

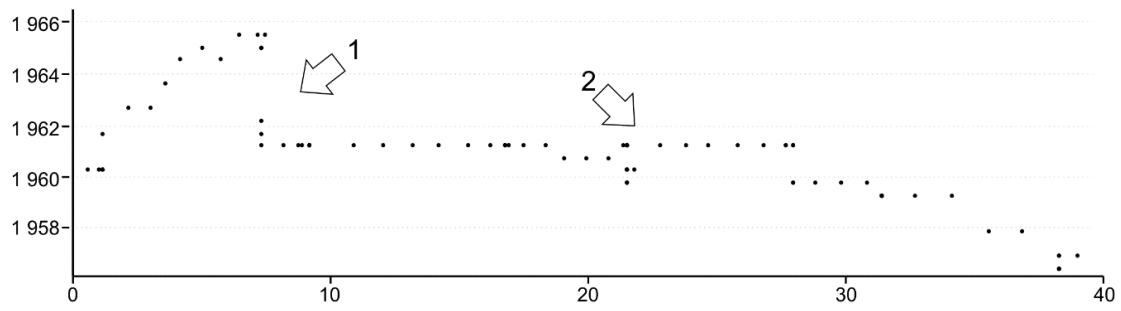

## 066-071

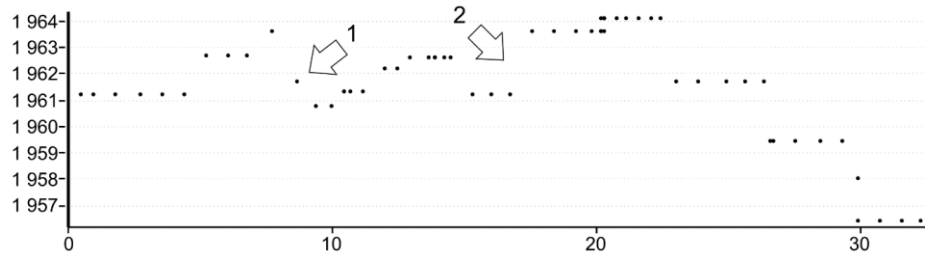

## 072-080

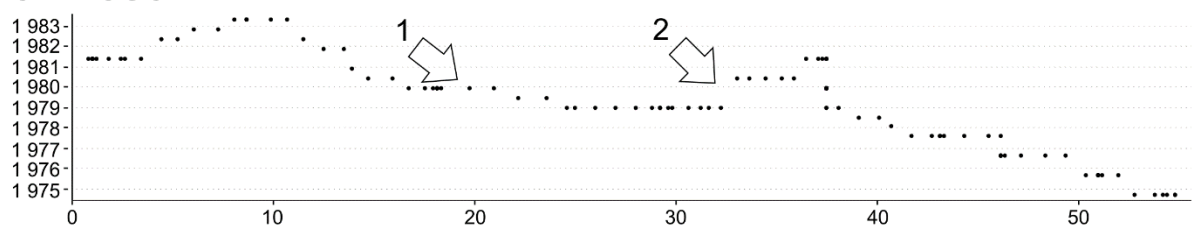

## 080-085

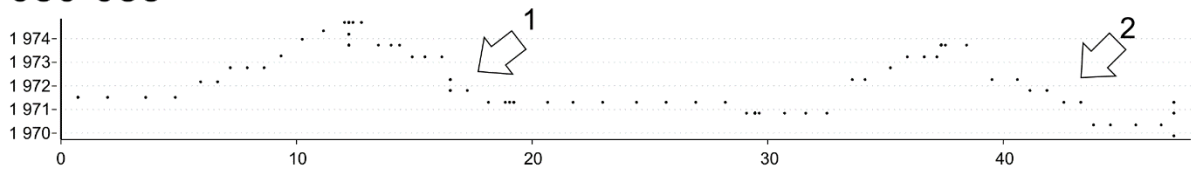

## 087-092

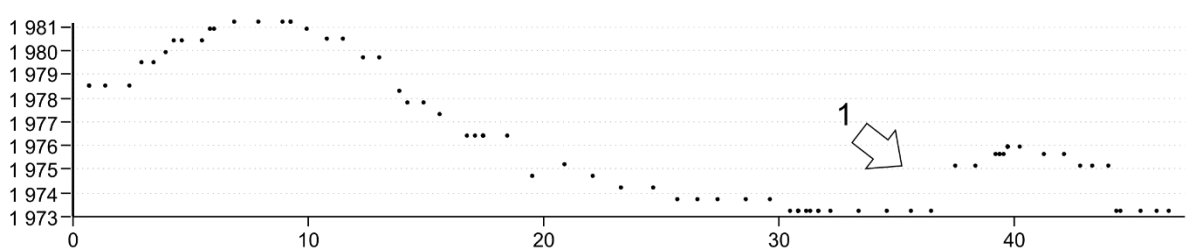

---

Site T3 – Ornak

---

OR02-OR03

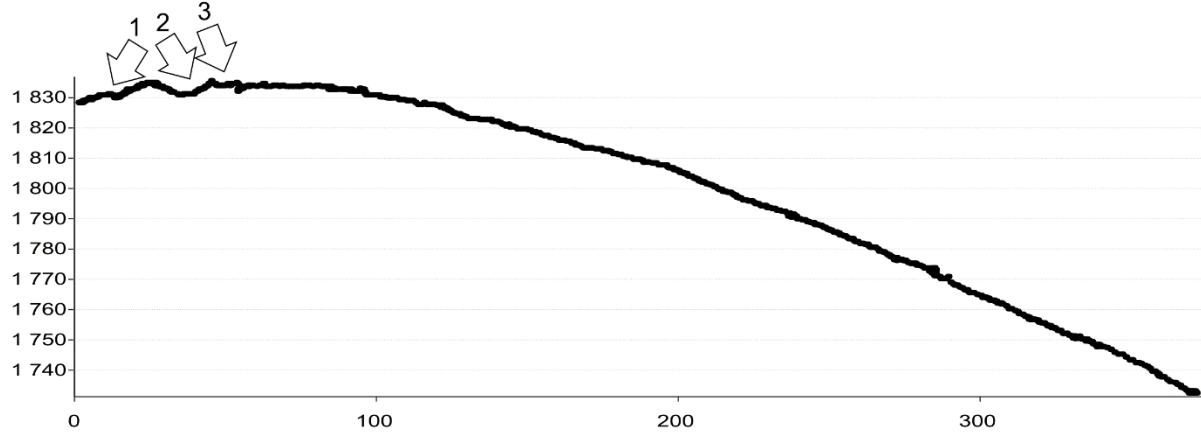

OR04-OR05

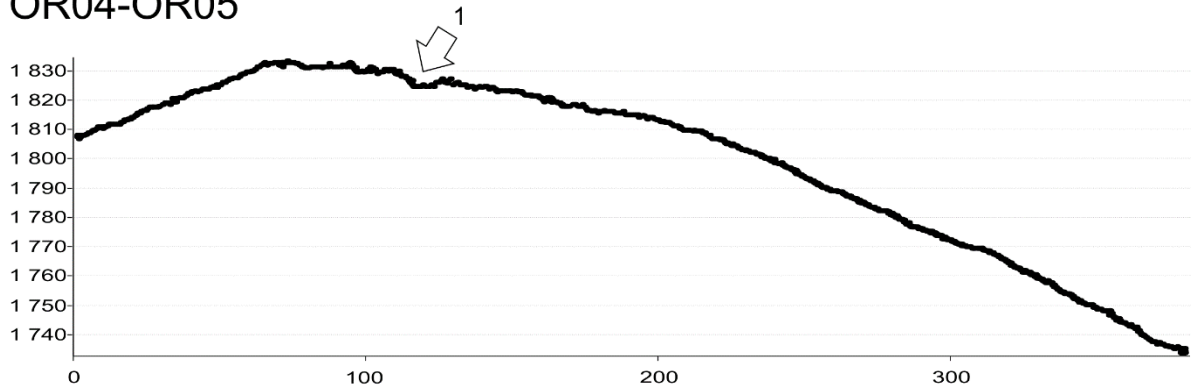

OR06-OR07

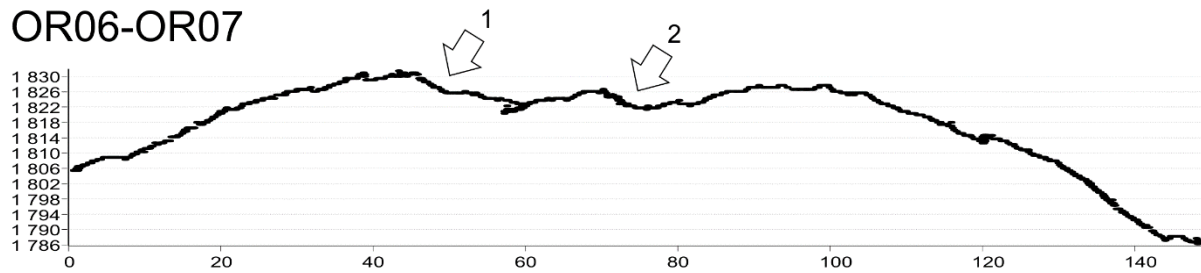

OR08-OR09

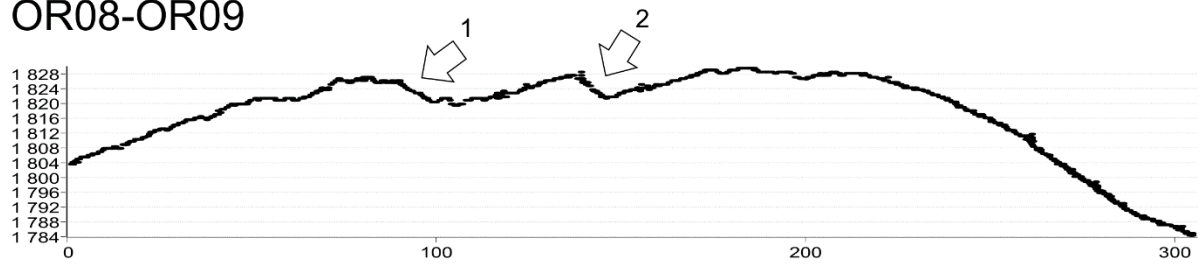

OR10-OR11

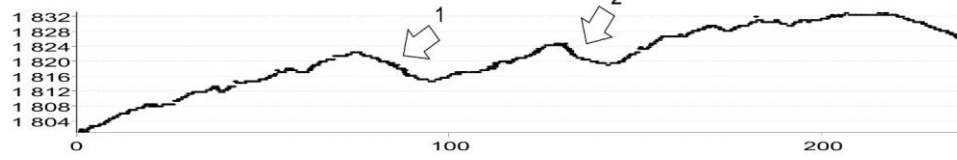

OR12-OR13

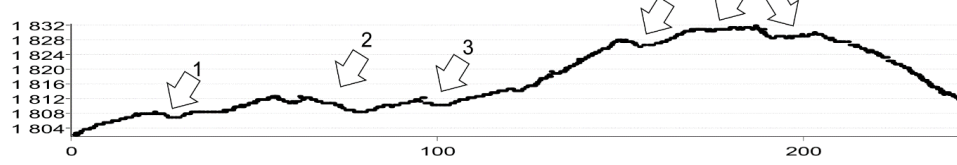

OR14-OR15

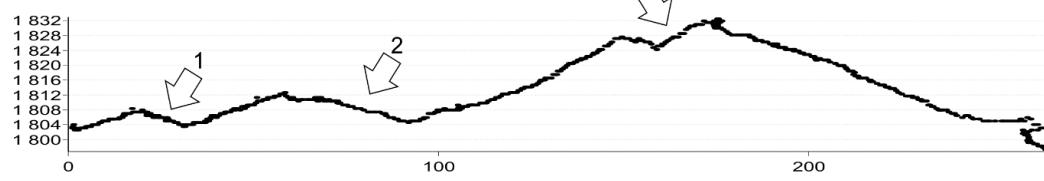

OR16-OR18

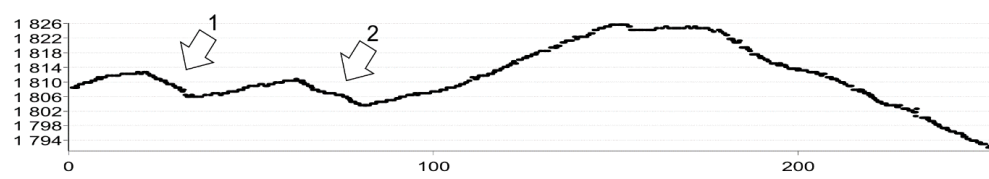

OR19-OR20

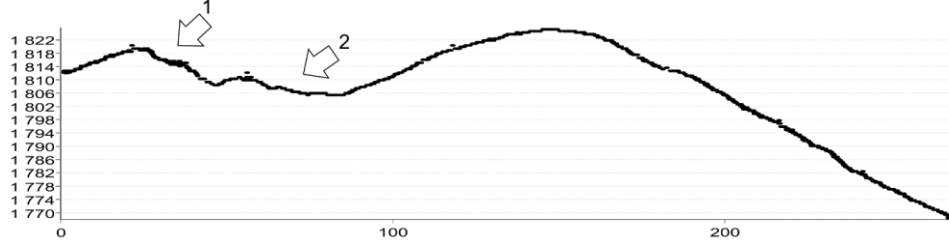

OR21-OR22

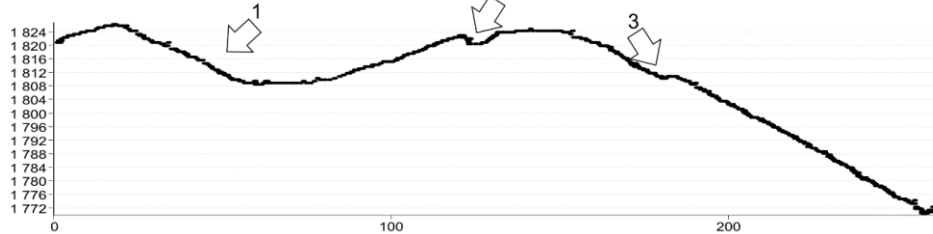

OR23-OR24

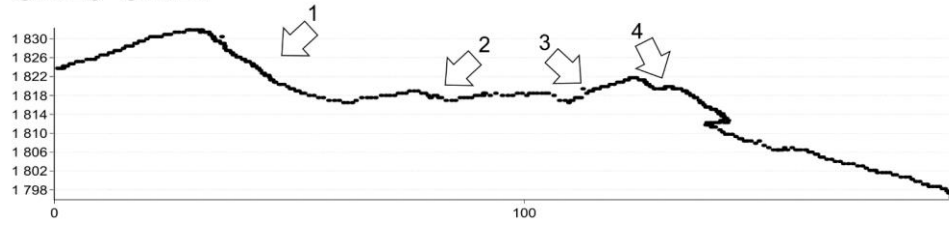

OR25-OR26

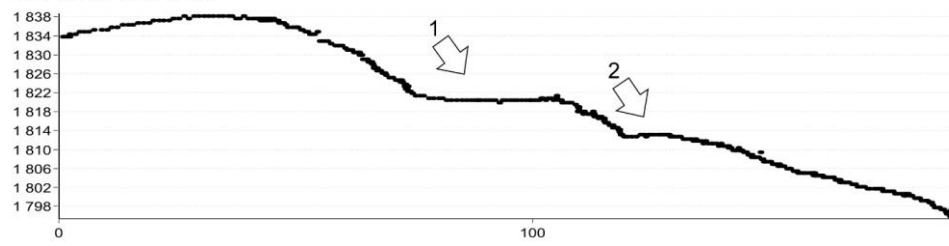

OR27-OR28

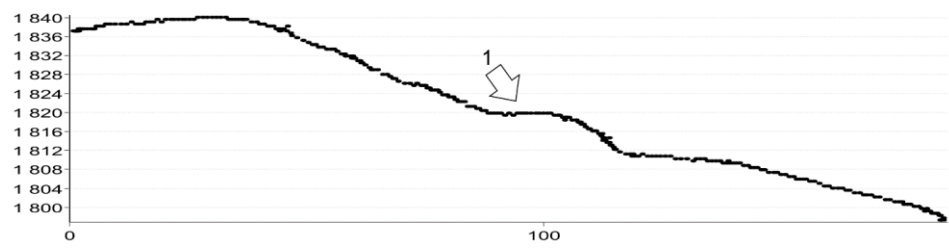

Supplement: Supplementary file 1 [file esurf-7-361-2019-supplement.zip › Supplementary material 2.pdf]
