# Supplementary material for: Deep-seated gravitational slope deformation scaling on Mars and Earth: same fate for different initial conditions and structural evolutions
Source: Copernicus journal article supplement (doi:10.5194/esurf-7-361-2019), 2019-04-16
Supplement: Supplementary file 1 [file esurf-7-361-2019-supplement.zip]

Archive with 3 entries (3 files):
- Supplementary material 2.pdf
- Supplementary material 1.xlsx
- esurf-7-361-2019-supplement-title-page.pdf
