# Supplementary material for: Deep-seated gravitational slope deformation scaling on Mars and Earth: same fate for different initial conditions and structural evolutions
Source: Copernicus journal article supplement (doi:10.5194/esurf-7-361-2019), 2019-04-16
Supplement: Supplementary file 1 [file esurf-7-361-2019-supplement.zip › esurf-7-361-2019-supplement-title-page.pdf]

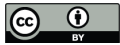

## *Supplement of*

# **Deep-seated gravitational slope deformation scaling on Mars and Earth: same fate for different initial conditions and structural evolutions**

**Olga Kromuszczyń**

*Correspondence to:* Daniel Mège (dmege@cbk.waw.pl)

- esurf-7-361-2019-supplement-title-page.pdf
- Supplementary material 1.xlsx
- Supplementary material 2.pdf

The copyright of individual parts of the supplement might differ from the CC BY 4.0 License.
