# Supplementary material for: Deep-seated gravitational slope deformation scaling on Mars and Earth: same fate for different initial conditions and structural evolutions
Source: Copernicus journal article supplement (doi:10.5194/esurf-7-361-2019), 2019-04-16
Supplement: Supplementary file 1 [file esurf-7-361-2019-supplement.zip › Supplementary material 1.xlsx]

## Sheet: dH Coprates
Profile name	c1p1		c1p2		c1p3		c1p4		c1p5		c1p6		c2p1		c2p2		c2p3		c2p4		c2p5
α [º]	60	70	60	70	60	70	60	70	60	70	60	70	60	70	60	70	60	70	60	70	60	70
Fault number	x [m]
1	110	60	30	20	80	40	680	420	180	110	110	70	190	130	120	80	250	180	210	140	120	90
2	120	70	480	300	350	210	20	20	80	60	220	160	90	70	60	30	260	150	70	50	140	100
3	110	80	160	110	110	90	20	10	190	130	260	190	250	180	30	20	420	300	30	20	100	70
4	50	40	290	200	200	120	190	140	270	190	140	100	180	90	370	270	120	70	80	60	150	70
5	180	130	-	-	-	-	130	130	250	120	-	-	220	120	80	40	200	140	120	70	180	100
6	-	-	-	-	-	-	-	-	-	-	-	-	40	20	70	50	-	-	120	90	250	120
	460	320	930	610	660	420	360	300	790	500	730	520	690	410	550	380	740	510	350	240	580	290

## Sheet: dZ Coprates
Profile name	c1p1		c1p2		c1p3		c1p4		c1p5		c1p6		c2p1		c2p2		c2p3		c2p4		c2p5
α [º]	60	70	60	70	60	70	60	70	60	70	60	70	60	70	60	70	60	70	60	70	60	70
Fault number	z [m]
1	140	150	40	45	130	140	820	830	250	260	140	150	450	490	260	300	450	490	380	430	260	280
2	230	240	700	710	580	590	55	60	110	120	300	340	220	240	120	130	500	510	100	110	280	300
3	210	230	220	230	230	240	50	55	270	300	320	360	650	690	70	80	1000	1060	50	55	200	220
4	110	120	430	480	350	380	270	300	380	430	180	200	440	390	820	930	290	240	200	230	290	330
5	340	350	-	-	-	-	240	270	370	420	-	-	560	490	160	130	450	490	230	180	340	370
6	-	-	-	-	-	-	-	-	-	-	-	-	80	90	140	160	-	-	230	260	520	420

## Sheet: dH Melas
Profile name	mc1		mc2		mc3		mc4		mc5
α [º]	60	70	60	70	60	70	60	70	60	70
Fault number	x [m]
1	370	250	310	210	420	280	330	240	240	160
2	390	270	360	250	690	470	710	490	370	250
3	600	410	630	440	260	180	310	210	330	230
4	820	550	900	590	850	570	1200	790	1370	900
5	580	380	680	450	600	400	610	400	300	200
6	460	320	670	440	570	390	510	350	640	430

## Sheet: dZ Melas
Profile name	mc1		mc2		mc3		mc4		mc5
α [º]	60	70	60	70	60	70	60	70	60	70
Fault number	z [m]
1	640	690	530	580	710	780	570	620	410	450
2	670	730	620	680	1190	1310	1230	1350	630	690
3	1030	1130	1100	1200	450	490	540	590	570	620
4	1420	1500	1560	1630	1480	1560	1090	1170	2370	2480
5	1010	1050	1180	1230	1040	1090	1060	1100	520	540
6	800	870	1170	1200	980	1170	890	960	1100	1190

## Sheet: dX Candor
Profile name	co1		co2		co3		co4		co5		co6
α [º]	60	70	60	70	60	70	60	70	60	70	60	70
Fault number	x [m]
1	380	260	110	80	480	340	800	560	360	240	560	390
2	580	380	100	70	580	400	-	-	310	200	110	70
3	170	110	60	40	140	100	-	-	180	120	260	180
4	120	90	-	-	-	-	-	-	-	-	-	-
														Candor

## Sheet: dZ Candor
Profile name	co1		co2		co3		co4		co5		co6
α [º]	60	70	60	70	60	70	60	70	60	70	60	70
Fault number	z [m]
1	660	720	190	210	830	930	1380	1550	620	660	960	1060
2	1010	1050	180	190	980	1090	-	-	540	540	190	200
3	290	290	100	110	240	260	-	-	310	330	450	490
4	220	240	-	-	-	-	-	-	-	-	-	-

## Sheet: dX Jamnicke Sedlo
Profile name	JS04-JS07		JS14-JS18		JS19-JS24		JS25-JS29		JS30-JS35		JS36-JS42		JS43-JS48		JS49-JS52		JS53-JS55
α [º]	60	70	60	70	60	70	60	70	60	70	60	70	60	70	60	70	60	70
Fault number	x [m]
1	1.1	0.7	4.5	3.1	3.8	2.6	1.5	1.1	3.1	2.1	5.9	4.1	7.7	5.3	3.3	2.2	2.9	1.9
2	-	-	-	-	-	-	2.2	1.5	3.7	2.5	3.1	2.8	5.6	3.8	13.1	8.7	-	-
3	-	-	-	-	-	-	-	-	5.9	4.0	-	-	-	-	-	-	-	-

## Sheet: dZ Jamnicke Sedlo
Profile name	JS04-JS07		JS14-JS18		JS19-JS24		JS25-JS29		JS30-JS35		JS36-JS42		JS43-JS48		JS49-JS52		JS53-JS55
α [º]	60	70	60	70	60	70	60	70	60	70	60	70	60	70	60	70	60	70
Fault number	z [m]
1	1.9	2.1	7.7	8.5	6.6	7.1	2.7	3.0	5.4	5.8	10.3	11.1	13.3	14.4	5.6	6.0	5.1	5.3
2	-	-	-	-	-	-	3.9	4.2	6.4	6.9	7.1	7.7	9.7	10.5	22.6	23.9	-	-
3	-	-	-	-	-	-	-	-	10.2	11.1	-	-	-	-	-	-	-	-

## Sheet: dX VGK
Profile name	011-025		027-030		031-034		036-037		038-041		042-046		050-053		054-057		058-065		066-071		072-080		080-085		087-092
α [º]	60	70	60	70	60	70	60	70	60	70	60	70	60	70	60	70	60	70	60	70	60	70	60	70	60	70
Fault number	x [m]
1	2.4	1.8	1.2	0.8	1.3	0.9	0.9	0.6	2.3	1.6	2.1	1.5	1.9	1.3	3.0	2.0	2.3	1.6	1.7	1.1	1.1	0.8	3.8	2.5	4.1	2.8
2	6.4	4.7	-	-	-	-	1.3	0.9	-	-	0.6	0.4	-	-	1.2	0.8	2.1	1.4	2.0	1.4	3.2	2.2	2.7	1.8	-	-
3	2.5	1.8	-	-	-	-	-	-	-	-	-	-	-	-	-	-	-	-	-	-	-	-	-	-	-	-
4	1.7	1.3	-	-	-	-	-	-	-	-	-	-	-	-	-	-	-	-	-	-	-	-	-	-	-	-
5	2.6	1.9	-	-	-	-	-	-	-	-	-	-	-	-	-	-	-	-	-	-	-	-	-	-	-	-

## Sheet: dZ VGK
Profile name	011-025		027-030		031-034		036-037		038-041		042-046		050-053		054-057		058-065		066-071		072-080		080-085		087-092
α [º]	60	70	60	70	60	70	60	70	60	70	60	70	60	70	60	70	60	70	60	70	60	70	60	70	60	70
Fault number	z [m]
1	4.2	4.9	2.0	2.3	2.2	2.4	2.3	2.4	4.1	4.5	3.7	4.1	3.3	3.6	5.1	5.5	4.1	4.5	2.9	3.1	1.9	2.1	6.5	6.9	7.0	7.6
2	11.1	12.8	-	-	-	-	1.6	1.8	-	-	1.1	1.2	-	-	2.1	2.3	3.5	3.8	3.4	3.8	5.5	5.9	4.7	4.9	-	-
3	4.3	5.0	-	-	-	-	-	-	-	-	-	-	-	-	-	-	-	-	-	-	-	-	-	-	-	-
4	3.0	3.4	-	-	-	-	-	-	-	-	-	-	-	-	-	-	-	-	-	-	-	-	-	-	-	-
5	4.6	5.3	-	-	-	-	-	-	-	-	-	-	-	-	-	-	-	-	-	-	-	-	-	-	-	-

[truncated: 2 more sheets: dX Ornak, dZ Ornak]
